# Supplementary material for: Ecological distribution and population physiology defined by proteomics in a natural microbial community
Source: PubMed Central journal article supplement — Mol Syst Biol. 2010 Jun 8;6:374. doi: 10.1038/msb.2010.30 (PMC2913395; doi:10.1038/msb.2010.30), 2010-06-08
Supplement: msb201030-s1.pdf [file msb201030-s1.pdf]

***Supplemental Information Table of Contents***

| <u>Item</u>         | <u>Page</u> |
|---------------------|-------------|
| <i>1. Figure S1</i> | 2           |
| <i>2. Figure S2</i> | 3           |
| <i>3. Figure S3</i> | 4-5         |
| <i>4. Figure S4</i> | 6           |
| <i>5. Table S1</i>  | 7-8         |
| <i>6. Table S2</i>  | 9           |
| <i>7. Table S3</i>  | 10          |
| <i>8. Table S4</i>  | 11-26       |
| <i>9. Table S5</i>  | 27-30       |
| <i>10. Table S6</i> | 31          |

**Figure S1**

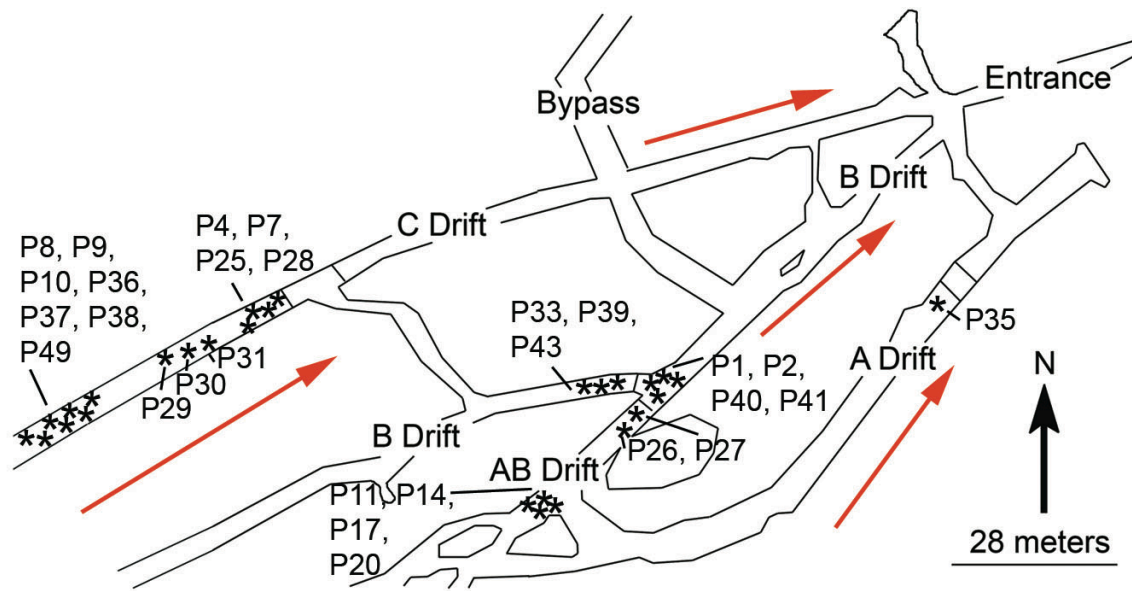

**Map of Richmond Mine.** Asterisks note collection sites for each sample and red arrows represent the direction of flow through the mine.

**Figure S2**

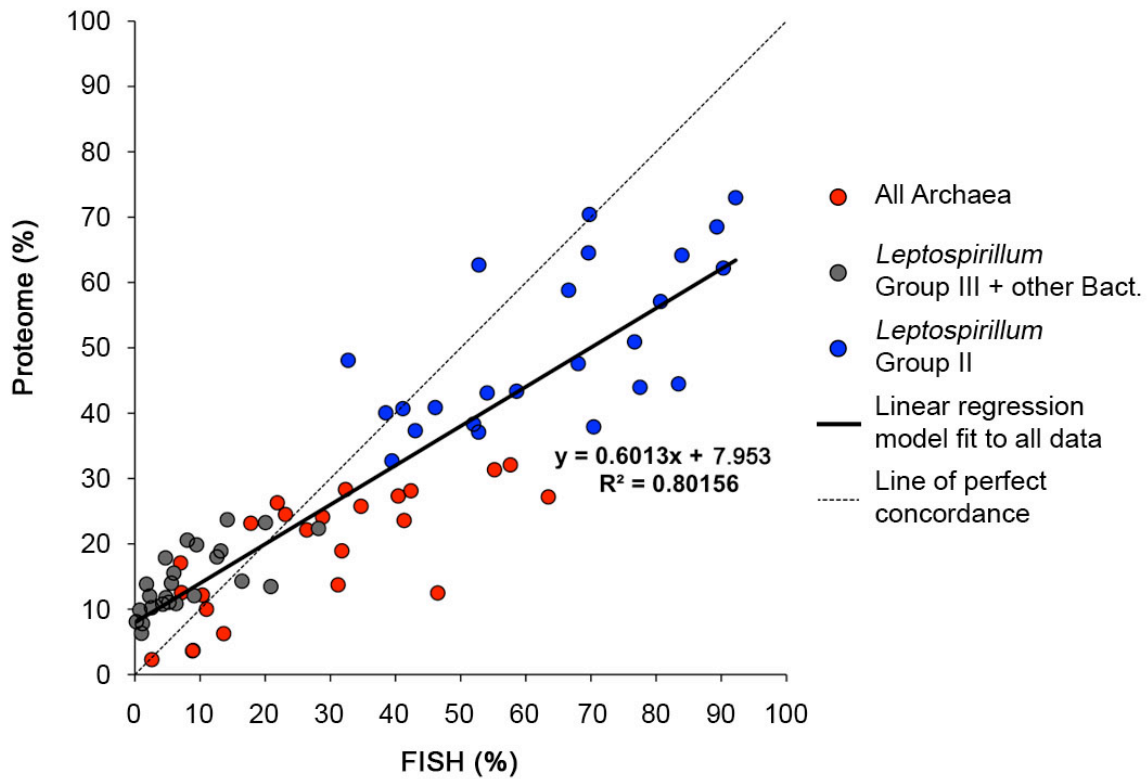

**Pair-wise Scatter Plot of FISH Relative Abundance Data Versus Proteomic Relative Abundance Data** Proteomic relative abundance data is based on the percentage of total proteins identified in a given sample summed for an organism (e.g summed NSAF values for *Leptospirillum* Group II) or across an organismal group (e.g. summed NSAF values for all Archaea). Dashed line of perfect concordance represents a 1:1 fit of the two data sets to each other.

Figure S3A

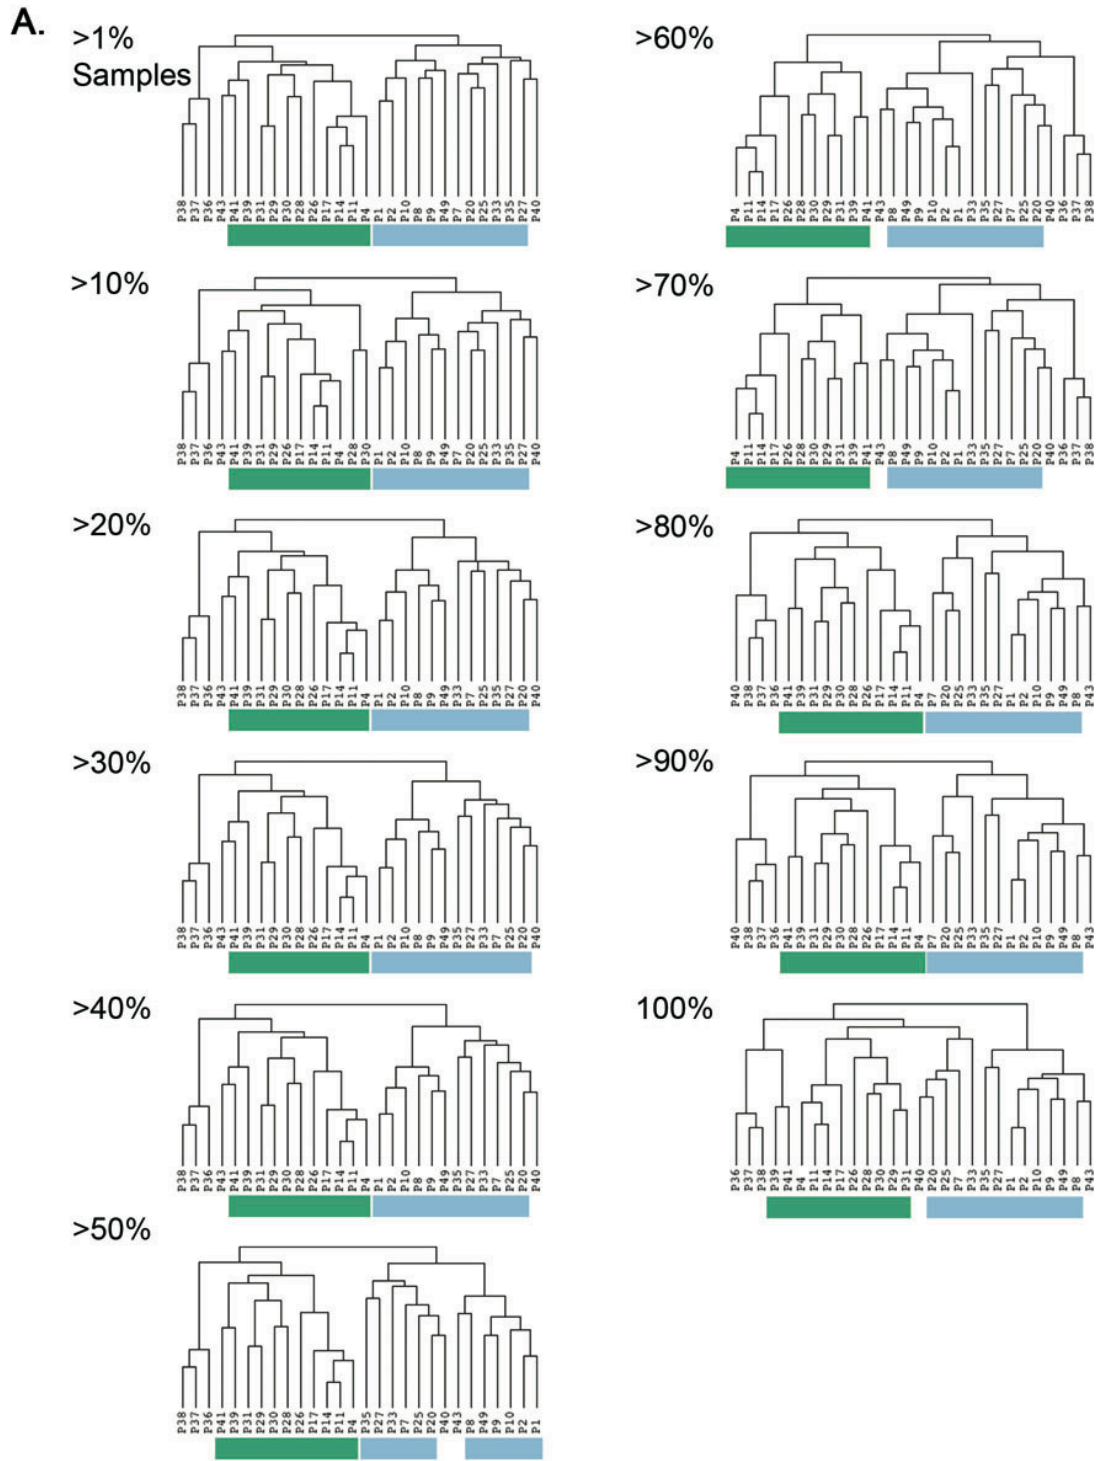

Figure S3B

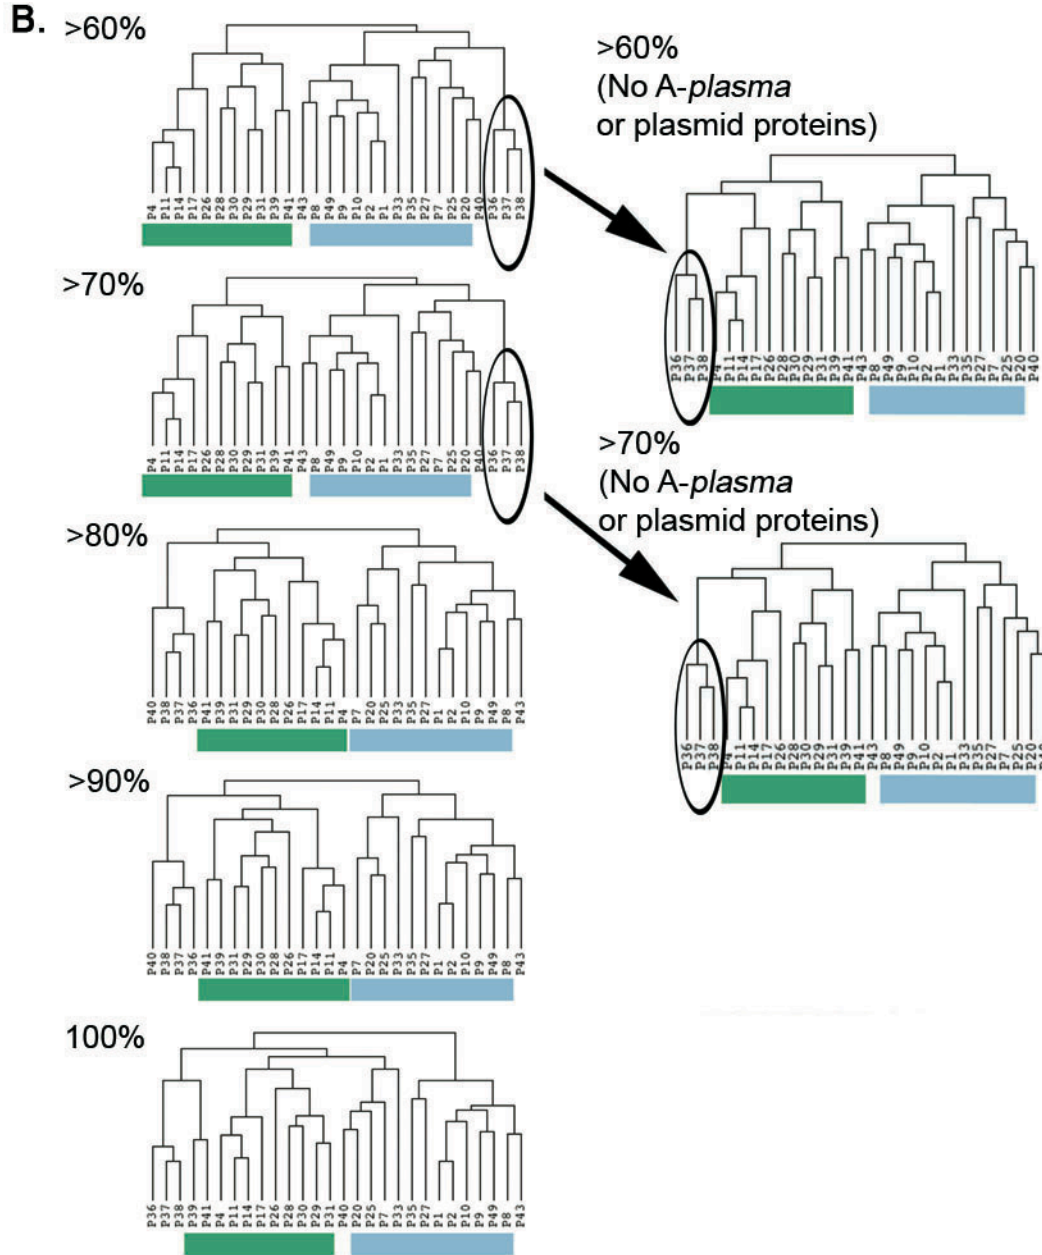

**Hierarchical Clustering of Samples Using Defined Subsets of Proteins From Whole-community Proteomes A.** Un-centered, average linkage clustering of proteome samples based on Pearson correlation metric using subsets of protein abundance data. **B.** Un-centered, average linkage clustering of proteome samples based on Pearson correlation metric using subsets of protein abundance data that do not include proteins from the plasmid or A-plasma category. When A-plasma and plasmid proteins are removed from the analysis the inconsistent samples (P36, P37 and P38) group back with the green expression group.

**Figure S4**

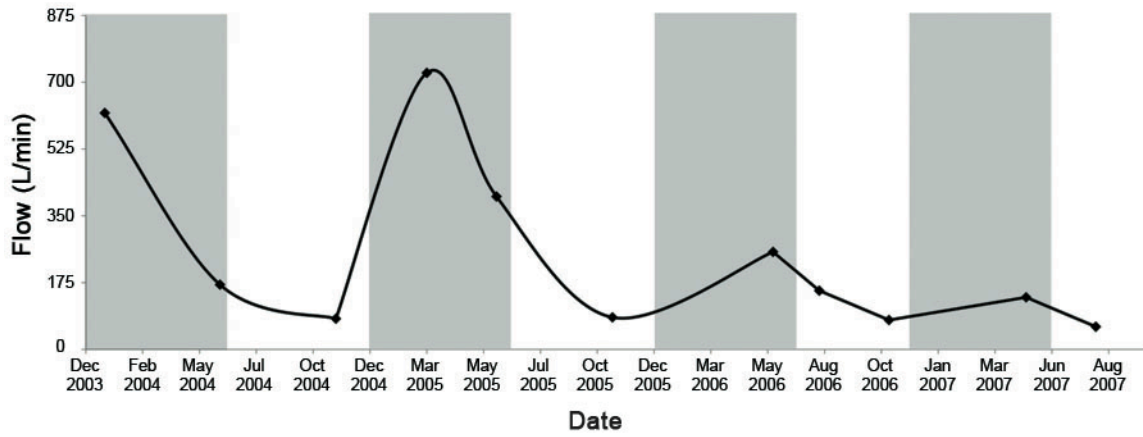

**Values of Flow Across all Sampling Dates** Values represent total outflow of the AMD solution on the day of sampling and are consistently highest during the rainy months of the year (Dec. – Jun. represented by shaded rectangles), reflecting seasonal precipitation rates.

**Table S1. Environmental Data Collected for Each Biofilm Sample\***

| Sample             | Full name                     | Site  | Flow (L/min) | pH   | Temp (°C) | Cond (mS/cm) | Fe <sup>2+</sup> (M) | FeT (M) | Cu (mM) | As (mM) | Zn (mM) |
|--------------------|-------------------------------|-------|--------------|------|-----------|--------------|----------------------|---------|---------|---------|---------|
| P1                 | ABmuckGS2 Nov06               | 1.50  | 83.3         | 0.84 | 43.0      | 85.1         | 0.278                | 0.328   | 1.06    | 0.39    | 27.44   |
| P2                 | ABmuck friable Nov06          | 1.50  | 83.3         | 0.84 | 43.0      | 85.1         | 0.278                | 0.328   | 1.06    | 0.39    | 27.44   |
| P4                 | C10m GS1 Nov2006              | 2.50  | 83.3         | 1.01 | 39.5      | 56.3         | 0.145                | 0.218   | 1.98    | 0.32    | 18.50   |
| P7                 | C10m GS2 Nov2006              | 2.50  | 83.3         | 1.01 | 39.5      | 56.3         | 0.145                | 0.218   | 1.98    | 0.32    | 18.50   |
| P8                 | C75m GS1 Nov2006              | 3.00  | 83.3         | 1.18 | 42.7      | 49.2         | 0.131                | 0.175   | 1.75    | 0.28    | 14.78   |
| P9                 | C75m GS1 Aug2006              | 3.00  | 166.6        | 1.00 | 43.0      | 57.9         | 0.226                | 0.283   | 2.57    | 0.31    | 16.74   |
| P10                | C75m GS1 Jun2006              | 3.00  | 276.3        | 0.70 | 43.0      | 70.5         | 0.263                | 0.303   | 4.12    | 0.37    | 21.17   |
| P11                | AB drift GS0 Jun2006          | 1.25  | 276.3        | 0.72 | 36.0      | ND           | 0.238                | 0.285   | ND      | ND      | ND      |
| P14                | AB drift GS1 Jun2006          | 1.25  | 276.3        | 0.72 | 36.0      | ND           | 0.238                | 0.285   | ND      | ND      | ND      |
| P17                | AB drift GS1.5 Jun2006        | 1.25  | 276.3        | 0.72 | 36.0      | ND           | 0.238                | 0.285   | ND      | ND      | ND      |
| P20                | AB drift GS2*** Jun2006       | 1.25  | 276.3        | 0.72 | 36.0      | ND           | 0.238                | 0.285   | ND      | ND      | ND      |
| P25                | C drift +8m GS1 Rep3 Aug06    | 2.50  | 166.6        | 0.92 | 39.3      | 65.2         | 0.227                | 0.281   | 2.80    | 0.37    | 20.79   |
| P26                | AB end GS0 Jan04              | 1.25  | 670.0        | 1.07 | 43.3      | ND           | ND                   | ND      | ND      | ND      | ND      |
| P27                | AB front GS3 Jun04            | 1.25  | 183.6        | 0.99 | 39.0      | 48.5         | ND                   | ND      | ND      | ND      | ND      |
| P28                | C drift +8m GS1-2 Nov2005     | 2.50  | 90.8         | 0.50 | 40.0      | ND           | ND                   | ND      | ND      | ND      | ND      |
| P29                | UBC level1 Nov2004            | 2.50  | 87.1         | ND   | 41.0      | ND           | ND                   | ND      | ND      | ND      | ND      |
| P30                | UBC level2 Nov2004            | 2.50  | 87.1         | ND   | 41.0      | ND           | ND                   | ND      | ND      | ND      | ND      |
| P31                | UBC level3 Nov2004            | 2.50  | 87.1         | ND   | 41.0      | ND           | ND                   | ND      | ND      | ND      | ND      |
| P33                | B drift +5m level 1-2 Mar2005 | 1.75  | 783.6        | 0.93 | 42.0      | ND           | ND                   | ND      | ND      | ND      | ND      |
| P35                | UBA Jun05                     | -3.00 | 433.2        | 1.10 | 41.0      | ND           | ND                   | ND      | ND      | ND      | ND      |
| P36                | C75m GS1 May07                | 3.00  | 147.6        | 1.17 | 44.4      | 43.5         | 0.093                | 0.122   | 1.54    | 0.24    | 9.83    |
| P37                | C75m GS1.5 May07              | 3.00  | 147.6        | 1.17 | 44.4      | 43.5         | 0.093                | 0.122   | 1.54    | 0.24    | 9.83    |
| P38                | C75m GS1 cell-like May07      | 3.00  | 147.6        | 1.17 | 44.4      | 43.5         | 0.093                | 0.122   | 1.54    | 0.24    | 9.83    |
| P39                | B+1m GS1 May07                | 1.75  | 147.6        | 0.99 | 46.0      | 58.9         | 0.140                | 0.165   | 0.45    | 0.26    | 12.30   |
| P40                | ABmuck GS2 May07              | 1.50  | 147.6        | 1.00 | 41.0      | 55.8         | 0.136                | 0.156   | 0.49    | 0.27    | 12.91   |
| P41                | ABmuck GS1(patchy) Aug07      | 1.50  | 64.4         | 0.83 | 37.1      | 75.3         | 0.181                | 0.224   | 0.47    | 0.36    | 20.03   |
| P43                | B+1m GS1- Aug07               | 1.75  | 64.4         | 0.87 | 43.0      | 81.0         | 0.200                | 0.221   | 0.45    | 0.34    | 19.65   |
| P49                | C75m GS1+ cell-like Aug2007   | 3.00  | 64.4         | 1.12 | 40.2      | 48.8         | 0.118                | 0.131   | 1.21    | 0.28    | 12.64   |
| Average            |                               | -     | 196          | 0.93 | 40.9      | 60.3         | 0.185                | 0.227   | 1.56    | 0.31    | 17.02   |
| Standard Deviation |                               | -     | 176          | 0.18 | 2.8       | 14.4         | 0.064                | 0.072   | 1.00    | 0.05    | 5.70    |

**Table S1. Continued**

| <b>Sample</b> | <b>Ca (mM)</b> | <b>SO<sub>4</sub><sup>2-</sup>(M)</b> | <b>NO<sub>3</sub><sup>-</sup>(nM)</b> | <b>NO<sub>2</sub><sup>-</sup>(nM)</b> | <b>CS</b> |
|---------------|----------------|---------------------------------------|---------------------------------------|---------------------------------------|-----------|
| P1            | 5.42           | 0.298                                 | 120                                   | 15                                    | 22.82     |
| P2            | 5.42           | 0.252                                 | 120                                   | 15                                    | 17.70     |
| P4            | 6.89           | 0.252                                 | 69                                    | 22                                    | 1.00      |
| P7            | 6.89           | 0.252                                 | 69                                    | 22                                    | 17.90     |
| P8            | 6.81           | 0.350                                 | 155                                   | 28                                    | 18.06     |
| P9            | 6.97           | 0.352                                 | 104                                   | < 5                                   | 18.16     |
| P10           | 7.22           | 0.361                                 | 342                                   | 24                                    | 17.81     |
| P11           | ND             | 0.522                                 | ND                                    | ND                                    | 1.93      |
| P14           | ND             | 0.636                                 | ND                                    | ND                                    | 6.27      |
| P17           | ND             | 0.417                                 | ND                                    | ND                                    | 6.27      |
| P20           | ND             | 0.417                                 | ND                                    | ND                                    | 17.55     |
| P25           | 7.09           | 0.529                                 | 48                                    | < 5                                   | 4.24      |
| P26           | ND             | 0.454                                 | ND                                    | ND                                    | 1.45      |
| P27           | ND             | ND                                    | ND                                    | ND                                    | 22.82     |
| P28           | ND             | ND                                    | ND                                    | ND                                    | ND        |
| P29           | ND             | ND                                    | ND                                    | ND                                    | 6.16      |
| P30           | ND             | ND                                    | ND                                    | ND                                    | 4.14      |
| P31           | ND             | 0.619                                 | ND                                    | ND                                    | 22.81     |
| P33           | ND             | 0.616                                 | ND                                    | ND                                    | 22.81     |
| P35           | ND             | 0.616                                 | ND                                    | ND                                    | ND        |
| P36           | 8.55           | ND                                    | 1680                                  | < 5                                   | 1.93      |
| P37           | 8.55           | ND                                    | 1680                                  | < 5                                   | ND        |
| P38           | 8.55           | ND                                    | 1680                                  | 10                                    | ND        |
| P39           | 7.36           | ND                                    | ND                                    | ND                                    | 4.24      |
| P40           | 7.95           | ND                                    | 420                                   | 10                                    | 17.66     |
| P41           | 6.59           | ND                                    | 190                                   | 10                                    | 1.45      |
| P43           | 6.39           | ND                                    | ND                                    | 20                                    | 18.16     |
| P49           | 7.82           | ND                                    | 210                                   | < 10                                  | 17.81     |
| AVG           | 7.15           | 0.434                                 | 492                                   | 18                                    | -         |
| STDEV         | 0.97           | 0.141                                 | 652                                   | 7                                     | -         |

**\* Values and abbreviations are reported as follows:**

**Site** - Quantitative measure of collection site based on sampling location within the mine (See materials and methods - sample collection and metadata measurements subsection)  
**Flow** - Solution discharge rates from the mine on the day of each sample's collection  
**pH** - in situ pH  
**Temp** - Temperature  
**Cond** - Conductivity  
**Fe<sup>2+</sup>** - Iron (II) concentration  
**FeT** - Iron (II) + Iron (III) concentration  
**Cu** - Copper concentration  
**As** - Arsenic concentration  
**Zn** - Zinc concentration  
**Ca** - Calcium concentration  
**SO<sub>4</sub><sup>2-</sup>** - sulfate concentration  
**NO<sub>3</sub><sup>-</sup>** - Nitrate concentration  
**NO<sub>2</sub><sup>-</sup>** - Nitrite concentration  
**CS** - Quantitative measure of community structure based on the branch lengths from the clustering of FISH data in Figure 1B  
**ND** - Not Determined



**Table S2. Community Structure Data Based on FISH Data**

| Sample             | Archaea (%)           | <i>Lepto. Gp. III</i> (%) | <i>Lepto. Gp. II</i> (%) | <i>Lepto. Gp II strains</i> (UBA%/5-way%) |
|--------------------|-----------------------|---------------------------|--------------------------|-------------------------------------------|
| P1 <sup>a,b</sup>  | 32.32                 | 9.10                      | 58.58                    | (10.31/48.27)                             |
| P2 <sup>a</sup>    | 63.45                 | 1.15                      | 32.72                    | (31.11/1.61)                              |
| P4                 | 10.98                 | 4.27                      | 83.94                    | (83.41/0.53)                              |
| P7 <sup>a</sup>    | 41.32                 | 12.59                     | 46.1                     | (38.81/7.29)                              |
| P8 <sup>a</sup>    | 34.69                 | 13.18                     | 51.98                    | (51.98/0.01)                              |
| P9 <sup>a</sup>    | 42.36                 | 4.76                      | 52.75                    | (51.51/1.24)                              |
| P10 <sup>a</sup>   | 57.63                 | 1.00                      | 41.12                    | (40.61/0.51)                              |
| P11                | 2.59                  | 5.22                      | 92.2                     | (89.38/2.82)                              |
| P14                | 8.84                  | 20.86                     | 69.76                    | (49.99/19.77)                             |
| P17                | 13.62                 | 16.43                     | 69.61                    | (55.63/13.99)                             |
| P20 <sup>a,b</sup> | 40.42                 | 20.04                     | 39.44                    | (14.82/24.63)                             |
| P25 <sup>a</sup>   | 17.79                 | 4.69                      | 77.52                    | (75.79/1.73)                              |
| P26                | 8.92                  | 1.77                      | 89.31                    | (89.18/0.13)                              |
| P27 <sup>a,b</sup> | 31.76                 | 14.18                     | 54.06                    | (6.02/48.04)                              |
| P28                | <b>ND<sup>c</sup></b> | <b>ND</b>                 | <b>ND</b>                | <b>ND</b>                                 |
| P29                | 10.35                 | 5.97                      | 80.67                    | (48.92/31.75)                             |
| P30                | 26.38                 | 5.59                      | 68.03                    | (57.10/10.93)                             |
| P31 <sup>b</sup>   | 31.18                 | 2.26                      | 66.56                    | (4.16/62.40)                              |
| P33 <sup>a,b</sup> | 21.85                 | 8.04                      | 70.41                    | (14.22/56.19)                             |
| P35 <sup>a</sup>   | <b>ND</b>             | <b>ND</b>                 | <b>ND</b>                | <b>ND</b>                                 |
| P36                | 7.00                  | 9.46                      | 83.43                    | (83.43/0.00)                              |
| P37                | <b>ND</b>             | <b>ND</b>                 | <b>ND</b>                | <b>ND</b>                                 |
| P38                | <b>ND</b>             | <b>ND</b>                 | <b>ND</b>                | <b>ND</b>                                 |
| P39                | 23.11                 | 0.21                      | 76.69                    | (76.69/0.00)                              |
| P40                | 28.79                 | 28.18                     | 43.03                    | (41.59/1.44)                              |
| P41                | 7.14                  | 2.55                      | 90.31                    | (88.79/1.52)                              |
| P43                | 46.47                 | 0.74                      | 52.78                    | (52.71/0.08)                              |
| P49 <sup>a</sup>   | 55.19                 | 6.31                      | 38.5                     | (38.50/0.00)                              |

<sup>a</sup> Designated as high developmental stage samples.

<sup>b</sup> Have a greater percentage of counted cells from the 5-way strain of *Leptospirillum* Group II than the UBA strain.

<sup>c</sup> Not Determined

**Table S3. Proteome Composition Data Using Species-assigned Protein Counts**

| <b>Organism</b>       | <b>P1</b>   | <b>P2</b>   | <b>P4</b>   | <b>P7</b>   | <b>P8</b>   | <b>P9</b>   | <b>P10</b>  | <b>P11</b>  | <b>P14</b>  | <b>P17</b>  | <b>P20</b>  | <b>P25</b>  | <b>P26</b>  | <b>P27</b>  | <b>P28</b>  |
|-----------------------|-------------|-------------|-------------|-------------|-------------|-------------|-------------|-------------|-------------|-------------|-------------|-------------|-------------|-------------|-------------|
| <i>Lepto. Gp. II</i>  | 1006        | 1097        | 1187        | 1069        | 1149        | 1083        | 993         | 1210        | 1166        | 1061        | 900         | 1012        | 1223        | 922         | 1085        |
| Unassigned            | 372         | 363         | 269         | 435         | 505         | 599         | 453         | 222         | 198         | 232         | 446         | 339         | 231         | 293         | 373         |
| <i>Lepto. Gp. III</i> | 257         | 154         | 172         | 438         | 543         | 324         | 135         | 152         | 202         | 213         | 610         | 383         | 221         | 488         | 225         |
| <i>G-plasma</i>       | 413         | 344         | 86          | 300         | 309         | 244         | 435         | 9           | 28          | 58          | 320         | 245         | 25          | 249         | 292         |
| <i>A-plasma</i>       | 49          | 118         | 52          | 125         | 287         | 401         | 178         | 5           | 9           | 16          | 92          | 57          | 16          | 23          | 110         |
| <i>Ferro. Type II</i> | 74          | 59          | 14          | 72          | 58          | 63          | 48          | 4           | 5           | 9           | 143         | 116         | 5           | 46          | 39          |
| <i>E-plasma</i>       | 44          | 40          | 12          | 51          | 43          | 48          | 54          | 5           | 6           | 8           | 44          | 31          | 8           | 22          | 43          |
| <i>Ferro. Type I</i>  | 54          | 40          | 11          | 41          | 40          | 39          | 33          | 5           | 7           | 6           | 131         | 68          | 7           | 54          | 28          |
| Plasmid               | 5           | 22          | 6           | 24          | 4           | 61          | 52          | 3           | 6           | 11          | 13          | 5           | 15          | 11          | 11          |
| <i>I-plasma</i>       | 17          | 15          | 9           | 17          | 20          | 22          | 27          | 5           | 2           | 4           | 19          | 12          | 3           | 7           | 18          |
| <i>Actino. 2</i>      | 13          | 10          | 13          | 15          | 13          | 9           | 9           | 14          | 8           | 9           | 13          | 12          | 10          | 6           | 10          |
| <i>Actino. 1</i>      | 8           | 7           | 10          | 10          | 9           | 9           | 8           | 11          | 8           | 9           | 12          | 12          | 7           | 8           | 10          |
| ARMAN2                | 6           | 4           | 1           | 11          | 15          | 4           | 8           | 5           | 3           | 2           | 3           | 4           | 2           | 4           | 6           |
| <i>Firmicutes sp.</i> | 2           | 7           | 4           | 8           | 2           | 2           | 2           | 6           | 5           | 4           | 5           | 4           | 9           | 5           | 3           |
| Virus                 | 0           | 1           | 4           | 0           | 1           | 11          | 5           | 2           | 3           | 2           | 1           | 2           | 3           | 1           | 1           |
| <b>Total</b>          | <b>2320</b> | <b>2281</b> | <b>1850</b> | <b>2616</b> | <b>2998</b> | <b>2919</b> | <b>2440</b> | <b>1658</b> | <b>1656</b> | <b>1644</b> | <b>2752</b> | <b>2302</b> | <b>1785</b> | <b>2139</b> | <b>2254</b> |

**Table S3. Continued**

| <b>Organism</b>       | <b>P29</b>  | <b>P30</b>  | <b>P31</b>  | <b>P33</b>  | <b>P35</b>  | <b>P36</b>  | <b>P37</b>  | <b>P38</b>  | <b>P39</b>  | <b>P40</b>  | <b>P41</b>  | <b>P43</b>  | <b>P49</b>  | <b>Total</b> | <b>AVG</b>  | <b>STDEV</b> |
|-----------------------|-------------|-------------|-------------|-------------|-------------|-------------|-------------|-------------|-------------|-------------|-------------|-------------|-------------|--------------|-------------|--------------|
| <i>Lepto. Gp. II</i>  | 1014        | 1045        | 994         | 1139        | 1070        | 1037        | 950         | 890         | 1000        | 788         | 1052        | 1270        | 878         | 1684         | 1046        | 113          |
| Unassigned            | 265         | 354         | 256         | 445         | 386         | 388         | 298         | 349         | 323         | 318         | 245         | 295         | 366         | 1350         | 344         | 94           |
| <i>Lepto. Gp. III</i> | 257         | 284         | 178         | 588         | 675         | 442         | 263         | 305         | 132         | 456         | 149         | 168         | 216         | 976          | 308         | 160          |
| <i>G-plasma</i>       | 102         | 264         | 151         | 345         | 60          | 119         | 95          | 115         | 255         | 328         | 127         | 138         | 266         | 639          | 204         | 124          |
| <i>A-plasma</i>       | 33          | 129         | 27          | 46          | 66          | 196         | 228         | 243         | 117         | 89          | 37          | 51          | 203         | 509          | 107         | 97           |
| <i>Ferro. Type II</i> | 37          | 25          | 18          | 132         | 19          | 21          | 15          | 21          | 31          | 28          | 12          | 20          | 32          | 259          | 42          | 37           |
| <i>E-plasma</i>       | 15          | 32          | 19          | 50          | 144         | 29          | 22          | 31          | 36          | 28          | 13          | 20          | 107         | 231          | 36          | 30           |
| <i>Ferro. Type I</i>  | 19          | 19          | 12          | 192         | 9           | 16          | 9           | 21          | 27          | 19          | 16          | 13          | 21          | 248          | 34          | 40           |
| Plasmid               | 2           | 3           | 1           | 8           | 36          | 43          | 27          | 31          | 0           | 21          | 2           | 5           | 21          | 86           | 16          | 16           |
| <i>I-plasma</i>       | 9           | 13          | 4           | 21          | 14          | 15          | 12          | 14          | 12          | 14          | 7           | 10          | 18          | 90           | 13          | 6            |
| <i>Actino. 2</i>      | 9           | 10          | 11          | 14          | 14          | 9           | 6           | 6           | 12          | 6           | 11          | 17          | 11          | 45           | 11          | 3            |
| <i>Actino. 1</i>      | 7           | 7           | 11          | 11          | 11          | 9           | 5           | 6           | 11          | 9           | 9           | 11          | 8           | 45           | 9           | 2            |
| ARMAN2                | 1           | 4           | 1           | 4           | 14          | 2           | 5           | 8           | 3           | 3           | 0           | 1           | 40          | 71           | 6           | 8            |
| <i>Firmicutes sp.</i> | 3           | 6           | 3           | 5           | 5           | 3           | 2           | 3           | 4           | 1           | 4           | 4           | 3           | 30           | 4           | 2            |
| Virus                 | 3           | 1           | 4           | 5           | 4           | 2           | 1           | 2           | 1           | 3           | 7           | 3           | 2           | 33           | 3           | 2            |
| <b>Total</b>          | <b>1776</b> | <b>2196</b> | <b>1690</b> | <b>3005</b> | <b>2527</b> | <b>2331</b> | <b>1938</b> | <b>2045</b> | <b>1964</b> | <b>2111</b> | <b>1691</b> | <b>2026</b> | <b>2192</b> | <b>6296</b>  | <b>2182</b> | <b>411</b>   |

**Table S4. *Leptospirillum* Group II Proteins Demonstrating Significant Abundance Differences Between Biofilm Developmental Stages**

| <b>Protein ID</b>              | <b>d-score</b> | <b>Q-value</b> | <b>Expression Ratio<br/>(LowDS/HighDS)</b> | <b>Annotation</b>                                                      |
|--------------------------------|----------------|----------------|--------------------------------------------|------------------------------------------------------------------------|
| <i>Amino Acid Biosynthesis</i> |                |                |                                            |                                                                        |
| UBAL2_80620197                 | 3.47           | 0.004          | 0.378                                      | Amino-acid N-acetyltransferase (EC 2.3.1.1)                            |
| UBAL2_85240200                 | 3.85           | 0.002          | 0.467                                      | Aspartate aminotransferase (EC 2.6.1.17)                               |
| UBAL2_82410602                 | 2.57           | 0.019          | 0.476                                      | Alanine racemase (EC 5.1.1.1)                                          |
| UBAL2_80620363                 | 3.00           | 0.009          | 0.524                                      | Histidinol-phosphate aminotransferase (EC 2.6.1.9)                     |
| UBAL2_85240093                 | 4.55           | 0.001          | 0.538                                      | GTP pyrophosphokinase (EC 2.7.6.5)                                     |
| UBAL2_81350085                 | 3.19           | 0.007          | 0.539                                      | Prephenate dehydrogenase (EC 1.3.1.12)                                 |
| UBAL2_82410105                 | 2.78           | 0.014          | 0.561                                      | Cystathionine gamma-synthase (EC 2.5.1.48)                             |
| UBAL2_80490024                 | 3.11           | 0.008          | 0.595                                      | Anthranilate phosphoribosyltransferase (EC 2.4.2.18)                   |
| UBAL2_82410230                 | 3.67           | 0.003          | 0.610                                      | Glycine dehydrogenase (Decarboxylating) subunit 1 (EC 1.4.4.2)         |
| UBAL2_80620364                 | 4.84           | 0.000          | 0.638                                      | Histidinol dehydrogenase (EC 1.1.1.23) (HDH)                           |
| UBAL2_80490236                 | 3.20           | 0.007          | 0.643                                      | 3-hydroxyisobutyrate dehydrogenase (EC 1.1.1.31)                       |
| UBAL2_82410307                 | 4.13           | 0.001          | 0.643                                      | Branched-chain amino acid aminotransferase (EC 2.6.1.42)               |
| UBAL2_82410631                 | 4.39           | 0.001          | 0.666                                      | Acetylornithine aminotransferase (EC 2.6.1.11)                         |
| UBAL2_81350083                 | 4.73           | 0.001          | 0.670                                      | Prephenate dehydratase (EC 4.2.1.51)                                   |
| UBAL2_82410317                 | 2.66           | 0.017          | 0.671                                      | Gamma-glutamyl phosphate reductase (EC 1.2.1.41)                       |
| UBAL2_85240207                 | 5.53           | 0.000          | 0.672                                      | 2-isopropylmalate synthase (EC 2.3.3.13)                               |
| UBAL2_85240183                 | 4.36           | 0.001          | 0.675                                      | Aspartate aminotransferase (EC 2.6.1.1)                                |
| UBAL2_82410621                 | 2.12           | 0.042          | 0.685                                      | Putative Ppx/GppA phosphatase family protein                           |
| UBAL2_82410182                 | 6.19           | 0.000          | 0.686                                      | Aspartate aminotransferase (EC 2.6.1.1)                                |
| UBAL2_80490034                 | 6.36           | 0.000          | 0.688                                      | Glutamate synthase, small subunit (EC 1.4.1.13)                        |
| UBAL2_82410633                 | 5.35           | 0.000          | 0.695                                      | Argininosuccinate synthase (EC 6.3.4.5)                                |
| UBAL2_81350079                 | 2.07           | 0.045          | 0.703                                      | Glycine oxidase (ThiO)                                                 |
| UBAL2_82410247                 | 4.81           | 0.001          | 0.709                                      | Diaminopimelate epimerase (EC 5.1.1.7)                                 |
| UBAL2_82410596                 | 3.85           | 0.002          | 0.712                                      | N-acetyl-gamma-glutamyl-phosphate reductase (EC 1.2.1.38)              |
| UBAL2_79310335                 | 2.66           | 0.017          | 0.718                                      | Glutamate decarboxylase (EC 4.1.1.15)                                  |
| UBAL2_81350101                 | 4.97           | 0.000          | 0.724                                      | Glutamate synthase [NADPH] large subunit (EC 1.4.1.13)                 |
| UBAL2_80270006                 | 4.25           | 0.001          | 0.730                                      | Spermidine synthase (EC 2.5.1.16)                                      |
| UBAL2_82410318                 | 2.23           | 0.035          | 0.733                                      | Glutamate 5-kinase (EC 2.7.2.11)                                       |
| UBAL2_79310071                 | 3.50           | 0.004          | 0.740                                      | 5-methyltetrahydrofolate--homocysteine methyltransferase (EC 2.1.1.13) |
| UBAL2_80490151                 | 2.77           | 0.014          | 0.748                                      | Dihydroxy-acid dehydratase (EC 4.2.1.9)                                |

**Table S4. Continued**

| <b>Protein ID</b>    | <b>d-score</b> | <b>Q-value</b> | <b>Expression Ratio<br/>(LowDS/HighDS)</b> | <b>Annotation</b>                                                    |
|----------------------|----------------|----------------|--------------------------------------------|----------------------------------------------------------------------|
| UBAL2_82410616       | 4.76           | 0.001          | 0.749                                      | Glycine hydroxymethyltransferase (EC 2.1.2.1)                        |
| UBAL2_82410232       | 2.88           | 0.012          | 0.752                                      | Glycine cleavage system T protein (EC 2.1.2.10)                      |
| UBAL2_82410229       | 4.20           | 0.001          | 0.753                                      | Glycine dehydrogenase (Decarboxylating) subunit 2 (EC 1.4.4.2)       |
| UBAL2_82410567       | 3.57           | 0.003          | 0.758                                      | Putative aminomethyltransferase                                      |
| UBAL2_80620359       | 2.85           | 0.012          | 0.760                                      | Histidine biosynthesis protein (HisF) (EC 5.3.1.16)                  |
| UBAL2_82410450       | 4.46           | 0.001          | 0.761                                      | Acetolactate synthase, large subunit (EC 2.2.1.6)                    |
| UBAL2_80490027       | 4.19           | 0.001          | 0.762                                      | Tryptophan synthase, beta subunit (EC 4.2.1.20)                      |
| UBAL2_85240202       | 4.09           | 0.001          | 0.774                                      | Homoserine dehydrogenase (EC 1.1.1.3)                                |
| UBAL2_79310208       | 3.37           | 0.005          | 0.774                                      | Adenosylhomocysteinase (EC 3.3.1.1)                                  |
| UBAL2_79310343       | 3.21           | 0.007          | 0.776                                      | 3-isopropylmalate dehydratase large subunit (EC 4.2.1.33)            |
| UBAL2_86920006       | 3.97           | 0.002          | 0.782                                      | Dihydroxy-acid dehydratase (EC 4.2.1.9)                              |
| UBAL2_81350042       | 3.38           | 0.005          | 0.782                                      | 3-hydroxyisobutyrate dehydrogenase (EC 1.1.1.31)                     |
| UBAL2_81350062       | 6.85           | 0.000          | 0.783                                      | D-3-phosphoglycerate dehydrogenase (EC 1.1.1.95)                     |
| UBAL2_80490070       | 3.88           | 0.002          | 0.785                                      | Glutamine synthetase, type I (EC 6.3.1.2)                            |
| UBAL2_79310227       | 2.44           | 0.024          | 0.792                                      | Pyrroline-5-carboxylate reductase (EC 1.5.1.2)                       |
| UBAL2_85240203       | 3.30           | 0.006          | 0.800                                      | Threonine synthase (EC 4.2.3.1)                                      |
| UBAL2_81350063       | 3.78           | 0.002          | 0.812                                      | Serine--glyoxylate transaminase (EC 2.6.1.45)                        |
| UBAL2_80270041       | 2.59           | 0.019          | 0.817                                      | 3-dehydroquininate synthetase (EC 4.2.3.4)                           |
| UBAL2_82410006       | 2.83           | 0.013          | 0.817                                      | Cysteine desulfurase (EC 2.8.1.7)                                    |
| UBAL2_79310204       | 2.99           | 0.010          | 0.817                                      | Threonine synthase (EC 4.2.3.1)                                      |
| UBAL2_79310206       | 1.97           | 0.052          | 0.851                                      | Cysteine synthase (EC 2.5.1.47)                                      |
| UBAL2_82410456       | 3.21           | 0.007          | 0.862                                      | 3-isopropylmalate dehydrogenase (EC 1.1.1.85)                        |
| UBAL2_81350084       | 3.48           | 0.004          | 0.866                                      | Phospho-2-dehydro-3-deoxyheptonate aldolase, subtype 2 (EC 2.5.1.54) |
| UBAL2_82410452       | 3.06           | 0.008          | 0.869                                      | Acetohydroxy acid isomeroreductase (EC 1.1.1.86)                     |
| UBAL2_82410637       | 2.58           | 0.019          | 0.879                                      | Dihydrodipicolinate synthase (EC 4.2.1.52)                           |
| UBAL2_81350093       | 2.49           | 0.022          | 0.898                                      | Putative methylenetetrahydrofolate reductase                         |
| UBAL2_80270007       | -6.32          | 0.000          | 5.003                                      | Putative S-adenosylmethionine decarboxylase                          |
| UBAL2_80490025       | -2.61          | 0.018          | 8.360                                      | Indole-3-glycerol phosphate synthase (EC 4.1.1.48)                   |
| UBAL2_80620013       | -3.97          | 0.002          | Inf                                        | Lysine 2,3-aminomutase                                               |
| <i>Cell Division</i> |                |                |                                            |                                                                      |
| UBAL2_79310231       | 2.69           | 0.016          | 0.799                                      | Cell division protein (FtsA)                                         |
| UBAL2_82410495       | -4.61          | 0.001          | 1.274                                      | ParB-like partition protein                                          |

**Table S4. Continued**

| <b>Protein ID</b>                                | <b>d-score</b> | <b>Q-value</b> | <b>Expression Ratio<br/>(LowDS/HighDS)</b> | <b>Annotation</b>                                                  |
|--------------------------------------------------|----------------|----------------|--------------------------------------------|--------------------------------------------------------------------|
| UBAL2_82410492                                   | -2.79          | 0.013          | Inf                                        | Glucose-inhibited division protein A                               |
| <i>Cell Wall, Membrane, and EPS Biosynthesis</i> |                |                |                                            |                                                                    |
| UBAL2_79310234                                   | 2.25           | 0.033          | Inf                                        | UDP-N-acetylenolpyruvoylglucosamine reductase (EC 1.1.1.158)       |
| UBAL2_79310299                                   | 1.90           | 0.058          | Inf                                        | Probable glycosyl transferase, family 2                            |
| UBAL2_85240155                                   | 2.32           | 0.029          | Inf                                        | Lipopolysaccharide heptosyltransferase II                          |
| CGL2_11284049                                    | 2.88           | 0.012          | 0.101                                      | Putative glycosyl transferase, family 2                            |
| UBAL2_80620336                                   | 4.34           | 0.001          | 0.239                                      | Predicted membrane protein                                         |
| UBAL2_81350078                                   | 5.11           | 0.000          | 0.360                                      | UDP-glucose 6-dehydrogenase (EC 1.1.1.22)                          |
| UBAL2_79310201                                   | 5.33           | 0.000          | 0.509                                      | Putative molybdopterin biosynthesis protein                        |
| UBAL2_79310264                                   | 2.45           | 0.023          | 0.520                                      | Glucosamine--fructose-6-phosphate aminotransferase (EC 2.6.1.16)   |
| UBAL2_80620158                                   | 4.48           | 0.001          | 0.624                                      | Glucosamine--fructose-6-phosphate aminotransferase (EC 2.6.1.16)   |
| UBAL2_80620137                                   | 4.43           | 0.001          | 0.632                                      | Phosphoglucosamine mutase (EC 5.4.2.10)                            |
| UBAL2_86920076                                   | 4.71           | 0.001          | 0.640                                      | ADP-L-glycero-D-mannoheptose-6-epimerase (EC 5.1.3.20)             |
| UBAL2_82410340                                   | 4.64           | 0.001          | 0.654                                      | Acetyl-CoA synthetase (EC 6.2.1.1)                                 |
| UBAL2_86920038                                   | 4.84           | 0.000          | 0.655                                      | Acetyl-CoA carboxylase, biotin carboxylase (EC 6.3.4.14)           |
| UBAL2_79310197                                   | 3.01           | 0.009          | 0.706                                      | UDP-glucose 4-epimerase (EC 5.1.3.2)                               |
| UBAL2_80620228                                   | 2.28           | 0.031          | 0.725                                      | Fatty acid/phospholipid synthesis protein (PlsX)                   |
| UBAL2_80620233                                   | 2.18           | 0.038          | 0.731                                      | 1-deoxy-D-xylulose 5-phosphate reductoisomerase (EC 1.1.1.267)     |
| UBAL2_79310341                                   | 2.22           | 0.035          | 0.740                                      | Glucose-1-phosphate thymidyltransferase (EC 2.7.7.24)              |
| UBAL2_79310261                                   | 2.90           | 0.011          | 0.768                                      | UDP-glucose 4-epimerase (EC 5.1.3.2)                               |
| UBAL2_80490100                                   | 2.03           | 0.048          | 0.775                                      | 3-deoxy-D-manno-octulosonate cytidyltransferase (EC 2.7.7.38)      |
| UBAL2_80620223                                   | 3.85           | 0.002          | 0.776                                      | 3-oxoacyl-(Acyl-carrier-protein) synthase II (EC 2.3.1.41)         |
| UBAL2_79310269                                   | 2.79           | 0.013          | 0.789                                      | UDP-galactopyranose mutase (EC 5.4.99.9)                           |
| UBAL2_79310263                                   | 2.54           | 0.020          | 0.790                                      | UDP-glucose 6-dehydrogenase (EC 1.1.1.22)                          |
| UBAL2_82410583                                   | 4.58           | 0.001          | 0.797                                      | Putative cell shape determining protein (MreB/Mrl)                 |
| UBAL2_80620224                                   | 2.54           | 0.020          | 0.827                                      | Acyl carrier protein (ACP)                                         |
| UBAL2_80620231                                   | 2.08           | 0.045          | 0.869                                      | 4-hydroxy-3-methylbut-2-en-1-yl diphosphate synthase (EC 1.17.4.3) |
| UBAL2_79310181                                   | -3.08          | 0.008          | 2.638                                      | Putative lytic transglycosylase                                    |
| UBAL2_79310186                                   | -5.57          | 0.000          | 2.830                                      | Probable outer membrane lipoprotein carrier protein                |
| UBAL2_82410526                                   | -3.18          | 0.007          | 8.235                                      | Cytidyltransferase family protein                                  |
| <i>Carbohydrate Biosynthesis</i>                 |                |                |                                            |                                                                    |
| UBAL2_80490092                                   | 2.30           | 0.030          | Inf                                        | Putative glycoside hydrolase, family 15                            |

**Table S4. Continued**

| <b>Protein ID</b> | <b>d-score</b> | <b>Q-value</b> | <b>Expression Ratio<br/>(LowDS/HighDS)</b> | <b>Annotation</b>                                                   |
|-------------------|----------------|----------------|--------------------------------------------|---------------------------------------------------------------------|
| UBAL2_80620329    | 2.98           | 0.010          | 0.147                                      | Glycogen debranching enzyme (GlgX) (EC 3.2.1.68)                    |
| UBAL2_79310287    | 2.43           | 0.024          | 0.177                                      | Putative glycosyl transferase, group 1                              |
| UBAL2_81350026    | 3.43           | 0.005          | 0.361                                      | Glycogen synthase (EC 2.4.1.21)                                     |
| UBAL2_85240240    | 2.86           | 0.012          | 0.467                                      | Glycogen phosphorylase (EC 2.4.1.1)                                 |
| UBAL2_79310106    | 3.88           | 0.002          | 0.495                                      | Glucose-6-phosphate isomerase (EC 5.3.1.9)                          |
| UBAL2_82410564    | 5.39           | 0.000          | 0.513                                      | Putative glycoside hydrolase, family 57                             |
| UBAL2_85240236    | 3.76           | 0.003          | 0.551                                      | Fructose-6-phosphate phosphoketolase (EC 4.1.2.22)                  |
| UBAL2_79310321    | 4.73           | 0.001          | 0.553                                      | Probable alpha amylase                                              |
| UBAL2_82410560    | 2.33           | 0.028          | 0.578                                      | Putative glycoside hydrolase, family 57                             |
| UBAL2_82410561    | 6.50           | 0.000          | 0.579                                      | 4-alpha-glucanotransferase (EC 2.4.1.25)                            |
| UBAL2_85240174    | 5.31           | 0.000          | 0.586                                      | Putative glycosyl transferase, family 9                             |
| UBAL2_82410559    | 6.47           | 0.000          | 0.627                                      | Glucose-1-phosphate adenylyltransferase (EC 2.7.7.27)               |
| UBAL2_82410562    | 6.07           | 0.000          | 0.655                                      | Galactose-1-phosphate uridylyltransferase (EC 2.7.7.12)             |
| UBAL2_86920155    | 6.84           | 0.000          | 0.663                                      | Transketolase (EC 2.2.1.1)                                          |
| UBAL2_80620201    | 4.86           | 0.000          | 0.678                                      | Glucose-6-phosphate dehydrogenase (EC 1.1.1.49)                     |
| UBAL2_86920154    | 7.49           | 0.000          | 0.696                                      | Transaldolase                                                       |
| UBAL2_82410373    | 4.99           | 0.000          | 0.707                                      | Phosphoglycerate kinase (EC 2.7.2.3)                                |
| UBAL2_80620124    | 2.88           | 0.012          | 0.710                                      | Putative alcohol dehydrogenase                                      |
| UBAL2_80490185    | 3.43           | 0.005          | 0.722                                      | Transaldolase                                                       |
| UBAL2_79310364    | 3.94           | 0.002          | 0.730                                      | Putative NAD-binding 6-phosphogluconate dehydrogenase               |
| UBAL2_80490184    | 3.88           | 0.002          | 0.733                                      | Glucose-6-phosphate 1-dehydrogenase (EC 1.1.1.49)                   |
| UBAL2_80270054    | 2.48           | 0.022          | 0.738                                      | Putative carbohydrate kinase, PfkB family                           |
| UBAL2_85240241    | 3.68           | 0.003          | 0.744                                      | Phosphoglucomutase, alpha-D-glucose phosphate-specific (EC 5.4.2.2) |
| UBAL2_80620194    | 5.17           | 0.000          | 0.761                                      | Phosphoenolpyruvate synthase (EC 2.7.9.2)                           |
| UBAL2_82410114    | 2.45           | 0.023          | 0.763                                      | Putative glycosyl hydrolase, BNR repeat                             |
| UBAL2_80620202    | 4.78           | 0.001          | 0.764                                      | 6-phosphogluconate dehydrogenase (decarboxylating) (EC 1.1.1.44)    |
| UBAL2_82410277    | 3.94           | 0.002          | 0.775                                      | Probable glycosyl transferase family protein                        |
| UBAL2_80490186    | 2.52           | 0.021          | 0.775                                      | Transketolase (EC 2.2.1.1)                                          |
| UBAL2_82410372    | 2.82           | 0.013          | 0.799                                      | Triosephosphate isomerase (EC 5.3.1.1)                              |
| UBAL2_80620149    | 2.89           | 0.012          | 0.800                                      | Enolase (EC 4.2.1.11)                                               |
| UBAL2_79310084    | 2.50           | 0.022          | 0.800                                      | Phosphomannomutase (EC 5.4.2.8)                                     |
| UBAL2_82410374    | 4.48           | 0.001          | 0.805                                      | Glyceraldehyde-3-phosphate dehydrogenase (EC 1.2.1.12)              |

**Table S4. Continued**

| <b>Protein ID</b>            | <b>d-score</b> | <b>Q-value</b> | <b>Expression Ratio<br/>(LowDS/HighDS)</b> | <b>Annotation</b>                                                      |
|------------------------------|----------------|----------------|--------------------------------------------|------------------------------------------------------------------------|
| UBAL2_79310322               | 2.73           | 0.015          | 0.816                                      | Putative alpha amylase, catalytic region                               |
| UBAL2_86920157               | 2.51           | 0.021          | 0.817                                      | Glucokinase (EC 2.7.1.2)                                               |
| UBAL2_86920153               | 3.70           | 0.003          | 0.817                                      | Glucose-6-phosphate 1-dehydrogenase (EC 1.1.1.49)                      |
| UBAL2_82410467               | 2.62           | 0.018          | 0.851                                      | Ribulose-bisphosphate carboxylase (EC 4.1.1.39)                        |
| UBAL2_85240237               | 2.16           | 0.039          | 0.867                                      | Fructose-bisphosphate aldolase (EC 4.1.2.13)                           |
| UBAL2_80490099               | 3.40           | 0.005          | 0.881                                      | Carbohydrate kinase, PfkB                                              |
| UBAL2_82410705               | 2.21           | 0.036          | 0.884                                      | Fructose-1,6-bisphosphatase (EC 3.1.3.11)                              |
| UBAL2_82410509               | -2.88          | 0.012          | 1.370                                      | Inositol monophosphatase (EC 3.1.3.25)                                 |
| <i>Cofactor Biosynthesis</i> |                |                |                                            |                                                                        |
| UBAL2_86920025               | 2.50           | 0.022          | 0.275                                      | 8-amino-7-oxononanoate synthase (EC 2.3.1.47)                          |
| UBAL2_80490030               | 2.68           | 0.016          | 0.487                                      | Folypolyglutamate synthase (EC 6.3.2.17)                               |
| UBAL2_82410623               | 2.15           | 0.040          | 0.514                                      | Ubiquinone/menaquinone biosynthesis methyltransferase                  |
| UBAL2_82410545               | 4.87           | 0.000          | 0.611                                      | L-aspartate oxidase (EC 1.4.3.16)                                      |
| UBAL2_85240114               | 2.68           | 0.016          | 0.629                                      | Nicotinate-nucleotide--dimethylbenzimidazole phosphoribosyltransferase |
| UBAL2_86920176               | 4.98           | 0.000          | 0.646                                      | Protoporphyrinogen oxidase (EC 1.3.3.4)                                |
| UBAL2_79310171               | 5.20           | 0.000          | 0.648                                      | Deoxyxylulose-5-phosphate synthase (EC 2.2.1.7)                        |
| UBAL2_85240217               | 5.98           | 0.000          | 0.659                                      | NAD <sup>+</sup> synthase (EC 6.3.5.1)                                 |
| UBAL2_79310212               | 7.32           | 0.000          | 0.683                                      | Oxygen-independent coproporphyrinogen III oxidase                      |
| UBAL2_82410326               | 2.26           | 0.033          | 0.698                                      | Probable 6-pyruvoyl tetrahydrobiopterin synthase family protein        |
| UBAL2_82410483               | 2.15           | 0.040          | 0.709                                      | Cobalamin biosynthesis protein (CbiD)                                  |
| UBAL2_82410528               | 4.19           | 0.001          | 0.717                                      | Glutamate-1-semialdehyde 2,1-aminomutase (EC 5.4.3.8)                  |
| UBAL2_85240124               | 5.04           | 0.000          | 0.735                                      | Putative precorrin-8X methylmutase (CbiC)                              |
| UBAL2_79310213               | 1.98           | 0.051          | 0.760                                      | Uroporphyrinogen decarboxylase (EC 4.1.1.37)                           |
| UBAL2_79310209               | 2.39           | 0.025          | 0.772                                      | S-adenosylmethionine synthetase (EC 2.5.1.6)                           |
| UBAL2_82410482               | 2.55           | 0.020          | 0.775                                      | Precorrin-6B methylase 2                                               |
| UBAL2_80620019               | 2.80           | 0.013          | 0.836                                      | Porphobilinogen synthase (EC 4.2.1.24)                                 |
| UBAL2_85240218               | 2.34           | 0.028          | 0.849                                      | 3,4-dihydroxy-2-butanone 4-phosphate synthase/GTP cyclohydrolase II    |
| UBAL2_81350092               | 1.94           | 0.053          | 0.884                                      | Methenyltetrahydrofolate cyclohydrolase (EC 3.5.4.9)                   |
| UBAL2_79310189               | 2.03           | 0.048          | 0.896                                      | 4-hydroxythreonine-4-phosphate dehydrogenase (EC 1.1.1.262)            |
| UBAL2_80620017               | 1.95           | 0.052          | 0.905                                      | Porphobilinogen deaminase (EC 2.5.1.61)                                |
| UBAL2_79310039               | -2.70          | 0.016          | 1.367                                      | Putative pyridoxal phosphate biosynthesis protein                      |
| UBAL2_82410380               | -2.66          | 0.017          | 2.014                                      | Siroheme synthase, N-terminal                                          |

**Table S4. Continued**

| <b>Protein ID</b>      | <b>d-score</b> | <b>Q-value</b> | <b>Expression Ratio<br/>(LowDS/HighDS)</b> | <b>Annotation</b>                                       |
|------------------------|----------------|----------------|--------------------------------------------|---------------------------------------------------------|
| UBAL2_80270018         | -3.81          | 0.002          | 7.327                                      | Aminodeoxychorismate lyase                              |
| <i>Core Metabolism</i> |                |                |                                            |                                                         |
| UBAL2_79310158         | 2.60           | 0.018          | Inf                                        | Putative NADH dehydrogenase (ubiquinone), H subunit     |
| UBAL2_85240244         | 4.48           | 0.001          | 0.146                                      | Probable cytochrome c oxidase, subunit I                |
| UBAL2_82410394         | 2.33           | 0.028          | 0.182                                      | Putative sulfide-quinone reductase                      |
| UBAL2_80490035         | 1.98           | 0.051          | 0.190                                      | Putative cytochrome b/b6, N-terminal                    |
| UBAL2_80490121         | 5.99           | 0.000          | 0.237                                      | Putative cytochrome c oxidase, subunit I                |
| UBAL2_82410389         | 4.54           | 0.001          | 0.502                                      | Putative UbiE/COQ5 methyltransferase                    |
| UBAL2_80620132         | 4.62           | 0.001          | 0.510                                      | NADH dehydrogenase (Quinone) (EC 1.6.99.5)              |
| UBAL2_79310250         | 2.06           | 0.046          | 0.555                                      | Probable ferredoxin                                     |
| UBAL2_82410286         | 2.33           | 0.028          | 0.603                                      | Dihydrolipoamide dehydrogenase (EC 1.8.1.4)             |
| UBAL2_82410149         | 4.00           | 0.002          | 0.649                                      | Protein of unknown function                             |
| UBAL2_81350053         | 4.17           | 0.001          | 0.651                                      | NADH dehydrogenase, subunit F (EC 1.6.99.5)             |
| UBAL2_79310157         | 4.36           | 0.001          | 0.652                                      | NADH dehydrogenase, chain I (EC 1.6.99.3)               |
| UBAL2_79310163         | 4.41           | 0.001          | 0.679                                      | NADH dehydrogenase (ubiquinone), D subunit (EC 1.6.5.3) |
| UBAL2_79310161         | 3.40           | 0.005          | 0.683                                      | NADH dehydrogenase (quinone) (EC 1.6.99.5)              |
| UBAL2_79310159         | 5.91           | 0.000          | 0.713                                      | NADH dehydrogenase (quinone), chain G (EC 1.6.99.5)     |
| UBAL2_82410531         | 3.78           | 0.002          | 0.731                                      | Pyruvate synthase alpha subunit (EC 1.2.7.1)            |
| UBAL2_85240238         | 2.23           | 0.035          | 0.750                                      | Dihydrolipoamide dehydrogenase (EC 1.8.1.4)             |
| UBAL2_81350018         | 3.59           | 0.003          | 0.767                                      | NADH dehydrogenase (Quinone) (EC 1.6.99.5)              |
| UBAL2_79310253         | 2.92           | 0.011          | 0.785                                      | Aconitate hydratase (EC 4.2.1.3)                        |
| UBAL2_86920055         | 2.45           | 0.023          | 0.798                                      | Putative oxidoreductase FAD/NAD(P)-binding              |
| UBAL2_79310255         | 4.87           | 0.000          | 0.807                                      | Succinyl-CoA synthetase, alpha subunit (EC 6.2.1.5)     |
| UBAL2_82410537         | 4.08           | 0.001          | 0.817                                      | Pyruvate synthase alpha chain (EC 1.2.7.1)              |
| UBAL2_79310256         | 3.30           | 0.006          | 0.818                                      | Succinyl-CoA synthetase, beta subunit (EC 6.2.1.5)      |
| UBAL2_82410359         | 2.39           | 0.025          | 0.825                                      | ATP synthase F1, alpha subunit (EC 3.6.3.15)            |
| UBAL2_79310249         | 3.38           | 0.005          | 0.841                                      | L-aspartate oxidase (EC 1.4.3.16)                       |
| UBAL2_79310247         | 3.11           | 0.008          | 0.859                                      | Succinyl-CoA synthetase, alpha subunit (EC 6.2.1.5)     |
| UBAL2_79310162         | 2.28           | 0.031          | 0.861                                      | Putative NADH dehydrogenase (ubiquinone), E subunit     |
| UBAL2_82410357         | 5.31           | 0.000          | 0.870                                      | ATP synthase F1, beta subunit (EC 3.6.3.15)             |
| UBAL2_79310248         | 2.70           | 0.016          | 0.890                                      | Succinyl-CoA synthetase, beta subunit (EC 6.2.1.5)      |
| UBAL2_82410360         | -2.70          | 0.016          | 1.225                                      | Putative ATP synthase F1, delta subunit                 |



**Table S4. Continued**

| <b>Protein ID</b>              | <b>d-score</b> | <b>Q-value</b> | <b>Expression Ratio<br/>(LowDS/HighDS)</b> | <b>Annotation</b>                                                |
|--------------------------------|----------------|----------------|--------------------------------------------|------------------------------------------------------------------|
| <i>General Functions</i>       |                |                |                                            |                                                                  |
| UBAL2_80620251                 | 2.53           | 0.020          | 0.100                                      | Putative amine oxidase                                           |
| UBAL2_82410657                 | 3.97           | 0.002          | 0.183                                      | Putative SAM-dependent methyltransferase                         |
| UBAL2_80620181                 | 2.37           | 0.026          | 0.420                                      | Putative acetyltransferase                                       |
| UBAL2_82410660                 | 2.59           | 0.019          | 0.437                                      | Probable heptosyltransferase family protein                      |
| UBAL2_82410225                 | 3.70           | 0.003          | 0.651                                      | Probable metal dependent phosphohydrolase                        |
| UBAL2_79310176                 | 3.32           | 0.006          | 0.651                                      | Metal dependent phosphohydrolase                                 |
| UBAL2_82410593                 | 4.99           | 0.000          | 0.673                                      | Putative cobalamin B12-binding/Radical SAM family protein        |
| UBAL2_82410624                 | 3.49           | 0.004          | 0.697                                      | Putative radical SAM family protein                              |
| UBAL2_79310184                 | 2.54           | 0.020          | 0.703                                      | Metallo-beta-lactamase family protein                            |
| UBAL2_79310357                 | 4.39           | 0.001          | 0.721                                      | Putative NAD-dependent epimerase/dehydratase                     |
| UBAL2_79310217                 | 2.73           | 0.015          | 0.726                                      | Putative radical SAM family protein                              |
| UBAL2_80490380                 | 3.56           | 0.003          | 0.728                                      | Aldo/keto reductase (EC 1.1.1.91)                                |
| UBAL2_82410519                 | 3.15           | 0.008          | 0.731                                      | Putative aminoglycoside phosphotransferase                       |
| UBAL2_80620344                 | 3.31           | 0.006          | 0.731                                      | Probable phosphohydrolase                                        |
| UBAL2_80490077                 | 3.28           | 0.006          | 0.748                                      | Probable AAA ATPase superfamily                                  |
| UBAL2_86920129                 | 3.16           | 0.007          | 0.757                                      | Putative flavoprotein reductase                                  |
| UBAL2_82410348                 | 3.36           | 0.005          | 0.781                                      | Putative outer membrane protein                                  |
| UBAL2_82410244                 | 2.43           | 0.024          | 0.782                                      | NHL repeat domain protein                                        |
| UBAL2_82410158                 | 3.49           | 0.004          | 0.792                                      | Putative carbon-nitrogen hydrolase                               |
| UBAL2_79310320                 | 3.09           | 0.008          | 0.799                                      | Zinc-containing alcohol dehydrogenase superfamily (EC 1.1.1.255) |
| UBAL2_82410395                 | 2.25           | 0.033          | 0.803                                      | Carbonic anhydrase                                               |
| UBAL2_82410701                 | 2.07           | 0.045          | 0.851                                      | Aldehyde dehydrogenase (EC 1.2.1.3)                              |
| UBAL2_85240121                 | 2.74           | 0.015          | 0.867                                      | Aldo/keto reductase (EC 1.1.1.65)                                |
| UBAL2_82410556                 | 4.47           | 0.001          | 0.885                                      | Probable O-methyltransferase family protein                      |
| UBAL2_82410341                 | -2.70          | 0.016          | 1.159                                      | Putative glyoxalase (GloA)                                       |
| UBAL2_82410575                 | -3.93          | 0.002          | 2.989                                      | Putative carboxylesterase                                        |
| UBAL2_80490014                 | -2.86          | 0.012          | Inf                                        | Probable iron-sulfur protein                                     |
| <i>Mobile Genetic Elements</i> |                |                |                                            |                                                                  |
| UBAL2_80620072                 | 2.69           | 0.016          | 0.591                                      | Probable mobilization protein (MobD)                             |
| UBAL2_85240068                 | -2.55          | 0.020          | 2.246                                      | Probable transposase                                             |
| UBAL2_79310397                 | -2.58          | 0.019          | 2.315                                      | Probable transposase                                             |

**Table S4. Continued**

| <b>Protein ID</b>                          | <b>d-score</b> | <b>Q-value</b> | <b>Expression Ratio<br/>(LowDS/HighDS)</b> | <b>Annotation</b>                                                                  |
|--------------------------------------------|----------------|----------------|--------------------------------------------|------------------------------------------------------------------------------------|
| UBAL2_82410476                             | -2.97          | 0.010          | 3.223                                      | Probable transposase                                                               |
| UBAL2_82410177                             | -3.00          | 0.009          | 3.306                                      | Transposase                                                                        |
| UBAL2_80620047                             | -3.13          | 0.008          | 3.898                                      | Putative transposase                                                               |
| UBAL2_80620297                             | -3.13          | 0.008          | 3.898                                      | Probable transposase                                                               |
| UBAL2_80490418                             | -3.17          | 0.007          | 4.014                                      | Putative transposase                                                               |
| UBAL2_80490302                             | -3.17          | 0.007          | 4.014                                      | Probable transposase                                                               |
| <i>Motility, Chemotaxis and Signalling</i> |                |                |                                            |                                                                                    |
| UBAL2_79040006                             | 2.06           | 0.046          | 0.136                                      | flagellar biosynthesis protein FlhF                                                |
| UBAL2_79310198                             | 2.71           | 0.016          | 0.138                                      | Putative multi-sensor signal transduction histidine kinase                         |
| UBAL2_82410640                             | 2.61           | 0.018          | 0.147                                      | Putative flagellar basal body rod protein                                          |
| UBAL2_82410197                             | 3.09           | 0.008          | 0.163                                      | Protein-glutamate methyltransferase (CheB) (EC 3.1.1.61)                           |
| UBAL2_82410221                             | 3.00           | 0.009          | 0.183                                      | Putative PAS/PAC sensor signal transduction histidine kinase                       |
| UBAL2_82410335                             | 5.64           | 0.000          | 0.242                                      | Putative diguanylate cyclase/phosphodiesterase                                     |
| UBAL2_80490108                             | 3.48           | 0.004          | 0.243                                      | Putative periplasmic sensor signal transduction histidine kinase                   |
| UBAL2_79310367                             | 3.23           | 0.007          | 0.279                                      | Putative osmosensitive K <sup>+</sup> channel signal transduction histidine kinase |
| UBAL2_79310190                             | 1.97           | 0.051          | 0.339                                      | Diguanylate cyclase/phosphodiesterase with PAS/PAC sensor(s)                       |
| UBAL2_80620131                             | 2.61           | 0.018          | 0.342                                      | Diguanylate cyclase with GAF sensor                                                |
| UBAL2_82410391                             | 3.60           | 0.003          | 0.550                                      | Putative diguanylate phosphodiesterase                                             |
| UBAL2_82410396                             | 3.01           | 0.009          | 0.611                                      | Diguanylate cyclase                                                                |
| UBAL2_82410196                             | 4.61           | 0.001          | 0.656                                      | Putative methyl-accepting chemotaxis sensory transducer                            |
| UBAL2_80490147                             | 3.44           | 0.004          | 0.676                                      | Multi-sensor signal transduction histidine kinase                                  |
| UBAL2_85240169                             | 2.95           | 0.010          | 0.689                                      | Putative PilT protein-like                                                         |
| UBAL2_80620198                             | 4.77           | 0.001          | 0.692                                      | Methyl-accepting chemotaxis sensory transducer                                     |
| UBAL2_82410198                             | 4.35           | 0.001          | 0.724                                      | Putative signal transduction histidine kinase (CheA)                               |
| UBAL2_82410195                             | 4.21           | 0.001          | 0.735                                      | Putative chemotaxis protein (CheW)                                                 |
| UBAL2_82410199                             | 3.28           | 0.006          | 0.778                                      | Putative response regulator receiver protein (CheY)                                |
| UBAL2_81350098                             | 3.21           | 0.007          | 0.820                                      | Putative methyl-accepting chemotaxis sensory transducer                            |
| UBAL2_80270042                             | 1.90           | 0.058          | 0.881                                      | Putative GAF sensor protein                                                        |
| CGL2_11278042                              | -2.55          | 0.020          | 2.146                                      | Putative methyl-accepting chemotaxis protein                                       |
| <i>Nucleotide Biosynthesis</i>             |                |                |                                            |                                                                                    |
| UBAL2_86920073                             | 3.57           | 0.003          | 0.485                                      | Amidophosphoribosyltransferase (EC 2.4.2.14)                                       |
| UBAL2_80490057                             | 4.81           | 0.001          | 0.493                                      | Aspartate carbamoyltransferase (EC 2.1.3.2)                                        |

**Table S4. Continued**

| <b>Protein ID</b>         | <b>d-score</b> | <b>Q-value</b> | <b>Expression Ratio<br/>(LowDS/HighDS)</b> | <b>Annotation</b>                                                      |
|---------------------------|----------------|----------------|--------------------------------------------|------------------------------------------------------------------------|
| UBAL2_80490058            | 4.25           | 0.001          | 0.583                                      | Dihydroorotase (EC 3.5.2.3)                                            |
| UBAL2_86920072            | 3.43           | 0.005          | 0.587                                      | Phosphoribosylformylglycinamide synthase II (EC 6.3.5.3)               |
| UBAL2_80490061            | 5.15           | 0.000          | 0.646                                      | Carbamoyl-phosphate synthase, large subunit (EC 6.3.5.5)               |
| UBAL2_80620237            | 5.63           | 0.000          | 0.736                                      | Formate--tetrahydrofolate ligase (EC 6.3.4.3)                          |
| UBAL2_82410054            | 4.37           | 0.001          | 0.742                                      | Ribonucleotide reductase (EC 1.17.4.1)                                 |
| UBAL2_80490101            | 3.56           | 0.004          | 0.760                                      | CTP synthase (EC 6.3.4.2)                                              |
| UBAL2_86920143            | 4.62           | 0.001          | 0.768                                      | Ribose-phosphate pyrophosphokinase (EC 2.7.6.1)                        |
| UBAL2_80490075            | 4.65           | 0.001          | 0.770                                      | Inosine-5'-monophosphate dehydrogenase (EC 1.1.1.205)                  |
| UBAL2_82410688            | 3.41           | 0.005          | 0.786                                      | Adenylosuccinate synthase (EC 6.3.4.4)                                 |
| UBAL2_80270053            | 2.38           | 0.026          | 0.842                                      | Methylthioadenosine phosphorylase (EC 2.4.2.28)                        |
| UBAL2_82410600            | 2.59           | 0.019          | 0.845                                      | Uridylate kinase                                                       |
| UBAL2_85240223            | 2.42           | 0.024          | 0.871                                      | Phosphoribosylaminoimidazole-succinocarboxamide synthase (EC 6.3.2.6)  |
| UBAL2_85240177            | 3.16           | 0.007          | 0.871                                      | Phosphoribosylaminoimidazolecarboxamide formyltransferase (EC 2.1.2.3) |
| UBAL2_85240222            | 2.01           | 0.049          | 0.877                                      | Adenylosuccinate lyase (EC 4.3.2.2)                                    |
| UBAL2_82410161            | -3.49          | 0.004          | 1.887                                      | Deoxyuridine-triphosphatase (EC 3.6.1.23)                              |
| <i>Protein Processing</i> |                |                |                                            |                                                                        |
| UBAL2_82410071            | 3.92           | 0.002          | Inf                                        | Putative proteasome component                                          |
| UBAL2_82410301            | 2.29           | 0.031          | 0.625                                      | ATP-dependent protease La (EC 3.4.21.53)                               |
| UBAL2_80620009            | 4.04           | 0.002          | 0.646                                      | Putative proteasome component                                          |
| UBAL2_79310010            | 3.85           | 0.002          | 0.697                                      | Peptidase S49 (SppA)                                                   |
| UBAL2_80490087            | 5.32           | 0.000          | 0.713                                      | ATP-dependent protease La (EC 3.4.21.53)                               |
| UBAL2_80620023            | 6.41           | 0.000          | 0.716                                      | Peptidase M41, FtsH (EC 3.6.4.6)                                       |
| UBAL2_80620010            | 1.95           | 0.052          | 0.721                                      | Putative AAA-family ATPase                                             |
| UBAL2_82410092            | 5.02           | 0.000          | 0.729                                      | Aminopeptidase N (EC 3.4.11.2)                                         |
| UBAL2_82410075            | 3.06           | 0.009          | 0.733                                      | Putative proteasome component                                          |
| UBAL2_82410555            | 2.29           | 0.031          | 0.745                                      | Putative Xaa-Pro aminopeptidase                                        |
| UBAL2_79310040            | 2.29           | 0.031          | 0.752                                      | Processing peptidase (EC 3.4.24.64)                                    |
| UBAL2_80620247            | 4.24           | 0.001          | 0.764                                      | Putative peptidase U62, modulator of DNA gyrase                        |
| UBAL2_86920150            | 4.06           | 0.002          | 0.823                                      | Peptidase S14, ClpP (EC 3.4.21.92)                                     |
| UBAL2_85240109            | 1.94           | 0.053          | 0.870                                      | Chaperone DnaJ                                                         |
| <i>DNA Replication</i>    |                |                |                                            |                                                                        |
| CGL2_11386018             | 2.65           | 0.017          | Inf                                        | DNA methyltransferase/helicase                                         |

**Table S4. Continued**

| <b>Protein ID</b>            | <b>d-score</b> | <b>Q-value</b> | <b>Expression Ratio<br/>(LowDS/HighDS)</b> | <b>Annotation</b>                                        |
|------------------------------|----------------|----------------|--------------------------------------------|----------------------------------------------------------|
| UBAL2_79310067               | 2.10           | 0.043          | 0.093                                      | Excinuclease ABC, C subunit (UvrC)                       |
| UBAL2_80620177               | 2.27           | 0.032          | 0.109                                      | DNA polymerase III, delta' subunit (EC 2.7.7.7)          |
| UBAL2_80270051               | 6.26           | 0.000          | 0.260                                      | DNA mismatch repair protein MutL                         |
| UBAL2_85240275               | 2.17           | 0.039          | 0.275                                      | DNA polymerase III, alpha subunit (EC 2.7.7.7)           |
| UBAL2_85240276               | 2.61           | 0.018          | 0.290                                      | Putative UvrD/rep helicase                               |
| UBAL2_79310423               | 4.53           | 0.001          | 0.339                                      | Putative helicase                                        |
| UBAL2_79310424               | 4.32           | 0.001          | 0.362                                      | Putative helicase                                        |
| UBAL2_80620156               | 1.88           | 0.060          | 0.464                                      | Putative ATP-dependent DNA helicase, UvrD/REP family     |
| UBAL2_82410449               | 2.91           | 0.011          | 0.520                                      | Chromosomal replication initiator protein (DnaA)         |
| UBAL2_79310187               | 3.21           | 0.007          | 0.556                                      | Excinuclease ABC, A subunit (UvrA)                       |
| UBAL2_86920007               | 2.64           | 0.017          | 0.588                                      | Putative DNA recombination protein, RmuC family          |
| UBAL2_80490081               | 2.91           | 0.011          | 0.602                                      | DNA ligase (EC 6.5.1.1)                                  |
| UBAL2_82410447               | 3.48           | 0.004          | 0.724                                      | DNA gyrase, B subunit (EC 5.99.1.3)                      |
| UBAL2_82410446               | 3.35           | 0.005          | 0.758                                      | DNA gyrase, A subunit                                    |
| UBAL2_82410448               | 3.76           | 0.003          | 0.763                                      | DNA polymerase III, beta chain (EC 2.7.7.7)              |
| UBAL2_82410550               | -2.95          | 0.010          | 1.314                                      | Putative histone-like DNA-binding protein                |
| UBAL2_79310173               | -2.58          | 0.019          | 1.401                                      | Exodeoxyribonuclease VII small subunit                   |
| UBAL2_82410122               | -3.34          | 0.005          | 2.679                                      | Probable crossover junction endodeoxyribonuclease (RuvC) |
| <i>Ribosome Biosynthesis</i> |                |                |                                            |                                                          |
| UBAL2_86920086               | 1.94           | 0.053          | 0.882                                      | Ribosomal protein S4 and related proteins                |
| UBAL2_82410488               | -2.66          | 0.017          | 1.154                                      | Ribosomal protein L9                                     |
| UBAL2_86920109               | -5.39          | 0.000          | 1.223                                      | Ribosomal protein L23                                    |
| UBAL2_82410041               | -2.88          | 0.012          | 1.227                                      | Ribosomal protein S20                                    |
| UBAL2_79310043               | -3.39          | 0.005          | 1.253                                      | Ribosomal protein S15                                    |
| UBAL2_86920094               | -4.10          | 0.001          | 1.263                                      | Ribosomal protein L30                                    |
| UBAL2_82410320               | -3.91          | 0.002          | 1.271                                      | Ribosomal protein L27                                    |
| UBAL2_86920107               | -5.51          | 0.000          | 1.280                                      | Ribosomal protein S19                                    |
| UBAL2_86920097               | -3.89          | 0.002          | 1.309                                      | Ribosomal protein L6P/L9E                                |
| UBAL2_79310008               | -2.62          | 0.018          | 1.316                                      | Ribosomal protein S16                                    |
| UBAL2_86920102               | -4.11          | 0.001          | 1.382                                      | Ribosomal protein S17                                    |
| UBAL2_86920116               | -4.33          | 0.001          | 1.390                                      | Ribosomal protein S12                                    |
| UBAL2_86920125a              | -5.56          | 0.000          | 2.208                                      | Ribosomal protein L33                                    |

**Table S4. Continued**

| <b>Protein ID</b>     | <b>d-score</b> | <b>Q-value</b> | <b>Expression Ratio<br/>(LowDS/HighDS)</b> | <b>Annotation</b>                                                      |
|-----------------------|----------------|----------------|--------------------------------------------|------------------------------------------------------------------------|
| UBAL2_82410332        | -4.03          | 0.002          | 4.360                                      | Ribosomal protein L35                                                  |
| <i>Stress Defense</i> |                |                |                                            |                                                                        |
| UBAL2_82410433        | 3.01           | 0.009          | 0.315                                      | CRISPR-associated helicase (Cas3)                                      |
| UBAL2_79310219        | 3.46           | 0.004          | 0.415                                      | Dihydroflavonol 4-reductase (EC 1.1.1.219)                             |
| UBAL2_79310333        | 1.87           | 0.061          | 0.538                                      | Malto-oligosyltrehalose synthase (EC 5.4.99.15)                        |
| UBAL2_79310331        | 2.36           | 0.027          | 0.561                                      | Trehalose synthase (EC 5.4.99.16)                                      |
| UBAL2_82410566        | 3.14           | 0.008          | 0.564                                      | Putative acriflavin resistance protein                                 |
| UBAL2_79310093        | 2.71           | 0.016          | 0.574                                      | Putative metallo-beta-lactamase family protein                         |
| UBAL2_82410432        | 4.23           | 0.001          | 0.606                                      | CRISPR-associated protein (Cse1)                                       |
| UBAL2_82410427        | 1.96           | 0.052          | 0.645                                      | CRISPR associated protein (Cse3)                                       |
| UBAL2_82410430        | 2.26           | 0.033          | 0.696                                      | CRISPR associated protein (Cse4)                                       |
| UBAL2_80620172        | 3.33           | 0.006          | 0.821                                      | Putative alkyl hydroperoxide reductase                                 |
| UBAL2_82410346        | 2.10           | 0.043          | 0.904                                      | Carboxymethylenebutenolidase (EC 3.1.1.45)                             |
| UBAL2_82410298a       | -2.79          | 0.013          | 1.092                                      | Probable OmpA family protein                                           |
| UBAL2_82410524        | -2.69          | 0.016          | 1.198                                      | Probable peptidyl-prolyl cis-trans isomerase                           |
| UBAL2_85240107        | -2.57          | 0.019          | 1.201                                      | Putative GrpE protein                                                  |
| UBAL2_79310073        | -3.46          | 0.004          | 1.495                                      | Peptidyl-prolyl cis-trans isomerase (EC 5.2.1.8)                       |
| UBAL2_80490086        | -2.68          | 0.016          | 1.601                                      | Putative heat shock protein (Hsp20)                                    |
| UBAL2_79310363        | -3.08          | 0.008          | 1.875                                      | Putative peroxiredoxin                                                 |
| UBAL2_85240216        | -4.19          | 0.001          | 3.097                                      | Putative thioredoxin family protein                                    |
| UBAL2_82410522        | -7.55          | 0.000          | 4.252                                      | Putative peptidyl-prolyl cis-trans isomerase                           |
| UBAL2_82410276        | -2.87          | 0.012          | 4.808                                      | MazG family protein                                                    |
| UBAL2_82410610        | -4.08          | 0.001          | 14.029                                     | Putative thioredoxin family protein                                    |
| UBAL2_80620111        | -2.86          | 0.012          | Inf                                        | RelB antitoxin                                                         |
| <i>Transcription</i>  |                |                |                                            |                                                                        |
| UBAL2_80270023        | 2.64           | 0.017          | 0.181                                      | Transcriptional activator, Baf family                                  |
| UBAL2_79310315        | 4.02           | 0.002          | 0.421                                      | Response regulator receiver modulated metal dependent phosphohydrolase |
| UBAL2_82410525        | 3.02           | 0.009          | 0.429                                      | Transcription-repair coupling factor                                   |
| UBAL2_86920062        | 3.93           | 0.002          | 0.578                                      | Putative transcriptional regulator, LysR family                        |
| UBAL2_80490146        | 3.69           | 0.003          | 0.596                                      | Two component, sigma54 specific, transcriptional regulator, Fis family |
| UBAL2_86920040        | 5.28           | 0.000          | 0.599                                      | Response regulator receiver (diguanylate cyclase/phosphodiesterase)    |
| UBAL2_80270035        | 3.23           | 0.007          | 0.630                                      | RNA polymerase, sigma 54 subunit, RpoN                                 |

**Table S4. Continued**

| <b>Protein ID</b>  | <b>d-score</b> | <b>Q-value</b> | <b>Expression Ratio<br/>(LowDS/HighDS)</b> | <b>Annotation</b>                                                      |
|--------------------|----------------|----------------|--------------------------------------------|------------------------------------------------------------------------|
| UBAL2_80490110     | 4.00           | 0.002          | 0.730                                      | Two component, sigma54 specific, transcriptional regulator, Fis family |
| UBAL2_86920117     | 5.66           | 0.000          | 0.734                                      | DNA-directed RNA polymerase, beta' subunit (EC 2.7.7.6)                |
| UBAL2_86920119     | 5.41           | 0.000          | 0.764                                      | DNA-directed RNA polymerase, beta subunit (EC 2.7.7.6)                 |
| UBAL2_82410671     | 2.66           | 0.017          | 0.799                                      | Transcriptional regulator, NifA, Fis Family                            |
| UBAL2_82410588     | 3.63           | 0.003          | 0.828                                      | Ribonucleases G and E                                                  |
| UBAL2_79310054     | 2.59           | 0.019          | 0.842                                      | Putative response regulator receiver protein                           |
| UBAL2_79310048     | 2.22           | 0.035          | 0.901                                      | Transcription termination factor (NusA)                                |
| UBAL2_86920032     | -2.61          | 0.018          | 1.113                                      | Putative DNA-directed RNA polymerase, omega subunit                    |
| UBAL2_81350051     | -3.10          | 0.008          | 1.278                                      | Putative transcriptional regulators, TraR/DksA family                  |
| UBAL2_79310148     | -2.66          | 0.017          | 1.436                                      | Putative nitrogen regulatory protein P-II                              |
| UBAL2_80620349a    | -4.03          | 0.002          | 1.775                                      | Putative ribonuclease H                                                |
| UBAL2_82410250     | -2.51          | 0.021          | 1.776                                      | Putative transcriptional regulators, TraR/DksA family                  |
| UBAL2_79310089     | -2.74          | 0.015          | 1.957                                      | Transcriptional regulator, BadM/Rrf2 family                            |
| UBAL2_81350107     | -2.71          | 0.016          | 1.965                                      | Putative bacterial regulatory protein, MerR family                     |
| UBAL2_85240220     | -3.30          | 0.006          | 3.624                                      | Transcription antitermination factor (NusB)                            |
| UBAL2_80620137a    | -3.36          | 0.005          | 6.025                                      | Putative transcriptional regulator, BadM/Rrf2 family                   |
| <i>Translation</i> |                |                |                                            |                                                                        |
| UBAL2_80490097     | 4.70           | 0.001          | 0.490                                      | GTP-binding protein (lepA)                                             |
| UBAL2_80270014     | 4.46           | 0.001          | 0.499                                      | Alanyl-tRNA synthetase (EC 6.1.1.7)                                    |
| UBAL2_82410516     | 3.12           | 0.008          | 0.559                                      | Isoleucyl-tRNA synthetase (EC 6.1.1.5)                                 |
| UBAL2_81350061     | 2.57           | 0.019          | 0.614                                      | Histidyl-tRNA lygase (EC 6.1.1.21)                                     |
| UBAL2_86920132     | 2.40           | 0.025          | 0.626                                      | RNA modification enzyme, MiaB family                                   |
| UBAL2_80620152     | 5.97           | 0.000          | 0.628                                      | Glutamyl-tRNA(Gln) amidotransferase B subunit                          |
| UBAL2_82410267     | 3.75           | 0.003          | 0.660                                      | Peptide chain release factor 3                                         |
| UBAL2_85240087     | 6.06           | 0.000          | 0.697                                      | Arginyl-tRNA synthetase (EC 6.1.1.19)                                  |
| UBAL2_80620230     | 4.31           | 0.001          | 0.699                                      | Prolyl-tRNA synthetase (EC 6.1.1.15)                                   |
| UBAL2_80490071     | 4.86           | 0.000          | 0.703                                      | Aspartyl-tRNA synthetase (EC 6.1.1.12)                                 |
| UBAL2_82410334     | 5.07           | 0.000          | 0.711                                      | Threonyl-tRNA synthetase (EC 6.1.1.3)                                  |
| UBAL2_86920019     | 4.65           | 0.001          | 0.721                                      | Glycyl-tRNA synthetase, beta subunit (EC 6.1.1.14)                     |
| UBAL2_86920113     | 5.40           | 0.000          | 0.743                                      | Translation elongation factor Tu (EC 2.7.7.4)                          |
| UBAL2_86920126     | 5.37           | 0.000          | 0.744                                      | Translation elongation factor Tu (EC 2.7.7.4)                          |
| UBAL2_82410543     | 4.05           | 0.002          | 0.746                                      | Glutamyl-tRNA synthetase (EC 6.1.1.17)                                 |

**Table S4. Continued**

| <b>Protein ID</b>              | <b>d-score</b> | <b>Q-value</b> | <b>Expression Ratio<br/>(LowDS/HighDS)</b> | <b>Annotation</b>                                                    |
|--------------------------------|----------------|----------------|--------------------------------------------|----------------------------------------------------------------------|
| UBAL2_79310074                 | 3.81           | 0.002          | 0.750                                      | GTP-binding protein (TypA)                                           |
| UBAL2_80620179                 | 3.87           | 0.002          | 0.764                                      | Methionyl-tRNA synthetase (EC 6.1.1.10)                              |
| UBAL2_80270019                 | 3.68           | 0.003          | 0.768                                      | Valyl-tRNA synthetase (EC 6.1.1.9)                                   |
| UBAL2_80490093                 | 3.01           | 0.009          | 0.769                                      | Histidyl-tRNA synthetase (EC 6.1.1.21)                               |
| UBAL2_79310047                 | 4.17           | 0.001          | 0.770                                      | Translation initiation factor IF-2                                   |
| UBAL2_85240214                 | 4.18           | 0.001          | 0.771                                      | Cysteinyl-tRNA synthetase, class Ia (EC 6.1.1.16)                    |
| UBAL2_86920140                 | 3.10           | 0.008          | 0.781                                      | GTP binding protein                                                  |
| UBAL2_80620153                 | 4.44           | 0.001          | 0.788                                      | Glutamyl-tRNA(Gln) amidotransferase A subunit / Amidase (EC 3.5.1.4) |
| UBAL2_82410038                 | 2.59           | 0.019          | 0.800                                      | Leucyl-tRNA synthetase (EC 6.1.1.4)                                  |
| UBAL2_86920114                 | 5.22           | 0.000          | 0.802                                      | Translation elongation factor G                                      |
| UBAL2_85240188                 | 4.03           | 0.002          | 0.802                                      | Translation initiation factor (EC 5.3.1.23)                          |
| UBAL2_82410329                 | 2.74           | 0.015          | 0.806                                      | Phenylalanyl-tRNA synthetase alpha chain (EC 6.1.1.20)               |
| UBAL2_79310042                 | 2.66           | 0.017          | 0.857                                      | Polyribonucleotide nucleotidyltransferase (EC 2.7.7.8)               |
| UBAL2_82410330                 | 2.66           | 0.017          | 0.870                                      | Phenylalanyl-tRNA synthetase beta chain                              |
| UBAL2_82410599                 | -5.53          | 0.000          | 1.224                                      | Elongation factor Ts (EF-Ts)                                         |
| UBAL2_86920141                 | -3.26          | 0.006          | 1.244                                      | Peptidyl-tRNA hydrolase (EC 3.1.1.29)                                |
| UBAL2_86920089                 | -2.52          | 0.021          | 1.327                                      | Translation initiation factor 1 (IF-1)                               |
| UBAL2_80620155                 | -2.95          | 0.010          | 2.046                                      | Glutamyl-tRNA(Gln) amidotransferase, C subunit                       |
| UBAL2_79310005                 | -2.76          | 0.014          | 5.066                                      | tRNA (guanine-N(1)-)-methyltransferase (EC 2.1.1.31)                 |
| <i>Transport and Secretion</i> |                |                |                                            |                                                                      |
| UBAL2_79310129                 | 2.43           | 0.024          | 0.133                                      | General secretion pathway protein E                                  |
| CGL2_11277178                  | 1.99           | 0.051          | 0.203                                      | TolQ                                                                 |
| UBAL2_85240089                 | 2.93           | 0.011          | 0.504                                      | Preprotein translocase, YajC subunit                                 |
| UBAL2_81350095                 | 2.78           | 0.014          | 0.535                                      | Probable cation transport protein                                    |
| UBAL2_79310378                 | 2.34           | 0.028          | 0.652                                      | Putative amino acid permease                                         |
| UBAL2_82410696                 | 3.52           | 0.004          | 0.653                                      | Phosphate import ATP-binding protein (PstB) (EC 3.6.3.27)            |
| UBAL2_79310167                 | 7.45           | 0.000          | 0.670                                      | Preprotein translocase SecA subunit                                  |
| UBAL2_82410693                 | 3.83           | 0.002          | 0.785                                      | Periplasmic phosphate binding protein                                |
| UBAL2_82410569                 | 2.44           | 0.023          | 0.817                                      | Probable secretion protein HlyD                                      |
| UBAL2_82410570                 | 2.26           | 0.032          | 0.823                                      | Putative outer membrane efflux protein                               |
| UBAL2_82410667                 | -3.32          | 0.006          | 1.910                                      | ABC transporter, ATP-binding protein (EC 3.6.3.25)                   |

**Table S4. Continued**

| <b>Protein ID</b>       | <b>d-score</b> | <b>Q-value</b> | <b>Expression Ratio<br/>(LowDS/HighDS)</b> | <b>Annotation</b>                       |
|-------------------------|----------------|----------------|--------------------------------------------|-----------------------------------------|
| <i>Unknown Function</i> |                |                |                                            |                                         |
| CGL2_11276035           | 1.91           | 0.057          | Inf                                        | Conserved hypothetical protein          |
| UBAL2_79310229          | 2.34           | 0.027          | Inf                                        | Conserved hypothetical protein          |
| UBAL2_80620026          | 2.01           | 0.049          | 0.104                                      | Conserved protein of unknown function   |
| UBAL2_82410659          | 4.44           | 0.001          | 0.214                                      | Conserved hypothetical protein          |
| UBAL2_82410116          | 6.25           | 0.000          | 0.277                                      | Hypothetical protein                    |
| UBAL2_79310354          | 2.71           | 0.016          | 0.281                                      | Protein of unknown function             |
| UBAL2_82410002          | 7.19           | 0.000          | 0.347                                      | Protein of unknown function             |
| UBAL2_80490114          | 3.38           | 0.005          | 0.352                                      | Conserved protein of unknown function   |
| CGL2_11277179           | 2.60           | 0.019          | 0.362                                      | Protein of unknown function             |
| UBAL2_82410674          | 3.97           | 0.002          | 0.366                                      | Conserved protein of unknown function   |
| UBAL2_80620160          | 4.45           | 0.001          | 0.394                                      | Conserved protein of unknown function   |
| UBAL2_80620005          | 4.55           | 0.001          | 0.416                                      | Conserved protein of unknown function   |
| UBAL2_79310021          | 2.51           | 0.021          | 0.420                                      | Protein of unknown function             |
| UBAL2_79310377          | 4.49           | 0.001          | 0.433                                      | Conserved protein of unknown function   |
| UBAL2_80620288          | 4.54           | 0.001          | 0.452                                      | Conserved protein of unknown function   |
| UBAL2_80620139          | 1.91           | 0.057          | 0.455                                      | Hypothetical protein                    |
| CGL2_11277198           | 1.93           | 0.054          | 0.478                                      | Protein of unknown function             |
| UBAL2_82410690          | 3.02           | 0.009          | 0.505                                      | Protein of unknown function             |
| UBAL2_80490238          | 1.95           | 0.052          | 0.505                                      | Conserved protein of unknown function   |
| UBAL2_82410574          | 2.87           | 0.012          | 0.556                                      | Conserved protein of unknown function   |
| UBAL2_80490237          | 2.67           | 0.017          | 0.566                                      | Probable alpha/beta fold family protein |
| UBAL2_82410507          | 7.34           | 0.000          | 0.567                                      | Conserved protein of unknown function   |
| UBAL2_80490235          | 2.97           | 0.010          | 0.578                                      | Conserved protein of unknown function   |
| UBAL2_82410103          | 2.90           | 0.011          | 0.594                                      | Protein of unknown function             |
| UBAL2_79310383          | 2.34           | 0.027          | 0.608                                      | Conserved protein of unknown function   |
| UBAL2_80490148          | 2.74           | 0.015          | 0.624                                      | Conserved protein of unknown function   |
| UBAL2_82410126          | 3.73           | 0.003          | 0.643                                      | Conserved protein of unknown function   |
| UBAL2_82410050a         | 3.59           | 0.003          | 0.657                                      | Hypothetical protein                    |
| UBAL2_79310225          | 1.93           | 0.053          | 0.695                                      | Protein of unknown function             |
| UBAL2_82410016          | 4.89           | 0.000          | 0.718                                      | Conserved protein of unknown function   |
| UBAL2_85240039a         | 2.01           | 0.049          | 0.749                                      | Conserved hypothetical protein          |



**Table S4. Continued**

| <b>Protein ID</b> | <b>d-score</b> | <b>Q-value</b> | <b>Expression Ratio<br/>(LowDS/HighDS)</b> | <b>Annotation</b>                        |
|-------------------|----------------|----------------|--------------------------------------------|------------------------------------------|
| CGL2_11172038     | 2.01           | 0.049          | 0.749                                      | Conserved hypothetical protein           |
| UBAL2_82410076    | 4.77           | 0.001          | 0.776                                      | Vesicle-fusing ATPase (EC 3.6.4.6)       |
| UBAL2_79310142    | 1.93           | 0.054          | 0.781                                      | Conserved protein of unknown function    |
| UBAL2_80270056    | 3.78           | 0.002          | 0.783                                      | Conserved protein of unknown function    |
| UBAL2_85240239    | 3.20           | 0.007          | 0.785                                      | Conserved protein of unknown function    |
| UBAL2_82410078    | 3.76           | 0.003          | 0.830                                      | Putative band 7 family protein           |
| UBAL2_86920044    | 3.14           | 0.008          | 0.836                                      | Protein of unknown function              |
| UBAL2_82410107    | 1.87           | 0.062          | 0.868                                      | Conserved protein of unknown function    |
| UBAL2_86920128    | 1.98           | 0.051          | 0.918                                      | Protein of unknown function              |
| UBAL2_80620157    | 2.88           | 0.012          | 0.920                                      | Protein of unknown function              |
| UBAL2_82410689    | -2.49          | 0.022          | 1.176                                      | Conserved protein of unknown function    |
| UBAL2_85240165    | -3.16          | 0.007          | 1.280                                      | Protein of unknown function              |
| UBAL2_82410240    | -3.86          | 0.002          | 1.298                                      | Protein of unknown function              |
| UBAL2_80620355    | -4.73          | 0.001          | 1.328                                      | Conserved protein of unknown function    |
| UBAL2_82410239    | -3.71          | 0.003          | 1.399                                      | Putative rhodanese-like domain protein   |
| UBAL2_85240269    | -2.68          | 0.016          | 1.597                                      | Protein of unknown function              |
| UBAL2_85240201    | -2.82          | 0.013          | 1.741                                      | Protein of unknown function              |
| UBAL2_82410080    | -2.71          | 0.016          | 1.770                                      | Protein of unknown function              |
| UBAL2_82410501    | -4.27          | 0.001          | 1.845                                      | Conserved protein of unknown function    |
| UBAL2_79310096    | -3.35          | 0.005          | 1.875                                      | Putative Kelch domain-containing protein |
| UBAL2_80620241    | -3.71          | 0.003          | 2.028                                      | Protein of unknown function              |
| UBAL2_86920030    | -3.63          | 0.003          | 2.096                                      | Conserved protein of unknown function    |
| UBAL2_82410472    | -3.23          | 0.007          | 2.201                                      | Protein of unknown function              |
| UBAL2_80270038    | -3.42          | 0.005          | 2.263                                      | Protein of unknown function              |
| UBAL2_86920135    | -3.91          | 0.002          | 2.294                                      | Protein of unknown function              |
| UBAL2_82410392    | -2.76          | 0.014          | 2.369                                      | Conserved protein of unknown function    |
| UBAL2_82410024    | -4.38          | 0.001          | 2.385                                      | Protein of unknown function              |
| UBAL2_82410259    | -3.51          | 0.004          | 2.417                                      | Conserved protein of unknown function    |
| UBAL2_80490135    | -3.07          | 0.008          | 2.571                                      | Protein of unknown function              |
| UBAL2_82410012    | -2.81          | 0.013          | 2.750                                      | Conserved protein of unknown function    |
| UBAL2_82410227    | -3.50          | 0.004          | 2.861                                      | Protein of unknown function              |
| UBAL2_80620008    | -2.56          | 0.020          | 2.985                                      | Hypothetical protein                     |

**Table S4. Continued**

| <b>Protein ID</b> | <b>d-score</b> | <b>Q-value</b> | <b>Expression Ratio<br/>(LowDS/HighDS)</b> | <b>Annotation</b>                      |
|-------------------|----------------|----------------|--------------------------------------------|----------------------------------------|
| UBAL2_82410530    | -2.65          | 0.017          | 3.224                                      | Hypothetical protein                   |
| UBAL2_85240162    | -5.01          | 0.000          | 3.341                                      | Protein of unknown function            |
| UBAL2_79310051    | -2.55          | 0.020          | 3.517                                      | Protein of unknown function            |
| UBAL2_80270055    | -2.90          | 0.011          | 3.844                                      | Putative TPR-domain containing protein |
| UBAL2_81350014    | -2.58          | 0.019          | 5.015                                      | Protein of unknown function            |
| UBAL2_79310390    | -2.74          | 0.015          | 5.474                                      | Protein of unknown function            |
| UBAL2_79310338    | -2.78          | 0.014          | 5.569                                      | Conserved protein of unknown function  |
| UBAL2_80490395    | -3.43          | 0.005          | 7.373                                      | Conserved protein of unknown function  |
| UBAL2_80490042a   | -3.95          | 0.002          | 13.303                                     | Hypothetical protein                   |
| UBAL2_80490393    | -2.66          | 0.017          | Inf                                        | Hypothetical protein                   |
| UBAL2_80490048    | -3.35          | 0.005          | Inf                                        | Protein of unknown function            |
| UBAL2_82410387a   | -3.06          | 0.009          | Inf                                        | Hypothetical protein                   |
| UBAL2_82410046    | -2.77          | 0.014          | Inf                                        | Hypothetical protein                   |
| UBAL2_82410473    | -3.27          | 0.006          | Inf                                        | Conserved protein of unknown function  |

**Table S5a. Data for a Subset of Lipid Metabolism Proteins Whose Abundances are Strongly Correlated with Temperature**

| Protein ID                          | r <sup>a</sup> | d-score <sup>b</sup> | Q-value <sup>c</sup> | Annotation                                      |
|-------------------------------------|----------------|----------------------|----------------------|-------------------------------------------------|
| UBA_LeptoII_Scaffold_8135_GENE_56   | -0.6           | -4.24                | 0                    | Cold shock protein                              |
| UBA_LeptoII_Scaffold_8241_GENE_482  | 0.64           | 3.67                 | 0                    | Precorrin-6B methylase 2                        |
| UBA_LeptoII_Scaffold_8692_GENE_33   | 0.62           | 3.78                 | 0                    | DNA/pantothenate metabolism flavoprotein        |
| UBA_LeptoII_Scaffold_8062_GENE_228  | 0.59           | 3.84                 | 0                    | Fatty acid/phospholipid synthesis protein, PlsX |
| UBA_LeptoII_Scaffold_8241_GENE_482a | 0.56           | 3.42                 | 0                    | Precorrin-6Y C5_15-methyltransferase            |
| UBA_LeptoII_Scaffold_8049_GENE_102  | 0.56           | 2.88                 | 0.029                | 2-Dehydro-3-deoxyphosphooctonate aldolase       |
| UBA_LeptoII_Scaffold_8692_GENE_144  | 0.55           | 2.9                  | 0.029                | GHMP kinase                                     |
| UBA_LeptoII_Scaffold_8524_GENE_131  | 0.51           | 2.36                 | 0.068                | UDP-N-acetylglucosamine acyltransferase         |
| UBA_LeptoII_Scaffold_8062_GENE_227  | 0.5            | 2.54                 | 0.058                | 3-oxoacyl-(Acyl-carrier-protein) synthase III   |
| UBA_LeptoII_Scaffold_8692_GENE_48   | 0.49           | 2.24                 | 0.083                | DegT/DnrJ/EryC1/StrS aminotransferase           |
| UBA_LeptoII_Scaffold_8692_GENE_15   | 0.44           | 2.57                 | 0.058                | Cobalt-precorrin-2 C(20)-methyltransferase      |
| UBA_LeptoII_R_Cont_7197_GENE_1      | 0.82           | ND <sup>d</sup>      | ND                   | Fatty acid phospholipid biosynthesis enzyme     |

<sup>a</sup>r-values represent the pearson or spearman rank correlation coefficient between a given protein's abundance and measurements for each environmental variable.

<sup>b</sup>A d-score is the *T*-statistic determined by SAM (Tusher *et al*, 2001)

<sup>c</sup>A *Q*-value is the lowest FDR at which that gene is called significant (analogous to a p-value, Tusher *et al*, 2001).

<sup>d</sup>Not determined

**Table S5b. Data for a Subset of Ribosomal Proteins whose Abundances are Strongly Correlated with Nitrate Concentrations**

| <b>Protein ID</b>                  | <b>r</b> | <b>d-score</b> | <b>Q-value</b> | <b>Annotation</b>         |
|------------------------------------|----------|----------------|----------------|---------------------------|
| UBA_LeptoII_Scaffold_8241_GENE_594 | 0.87     | 3.25           | 0              | Ribosomal protein L13     |
| UBA_LeptoII_Scaffold_8692_GENE_86  | 0.87     | 3.25           | 0              | Ribosomal protein S4      |
| UBA_LeptoII_Scaffold_7931_GENE_4   | 0.85     | 3.02           | 0              | Ribosomal protein L19     |
| UBA_LeptoII_Scaffold_8692_GENE_102 | 0.84     | 2.95           | 0              | Ribosomal protein S17     |
| UBA_LeptoII_Scaffold_8241_GENE_332 | 0.78     | 2.52           | 0              | Ribosomal protein L35     |
| UBA_LeptoII_Scaffold_8062_GENE_370 | 0.74     | 2.34           | 0              | Ribosomal protein L31     |
| UBA_LeptoII_Scaffold_8692_GENE_97  | 0.73     | 2.25           | 0.014          | Ribosomal protein L6P/L9E |
| UBA_LeptoII_Scaffold_8692_GENE_87  | 0.73     | 2.24           | 0.014          | Ribosomal protein S11     |
| UBA_LeptoII_Scaffold_8241_GENE_595 | 0.71     | 2.17           | 0.014          | Ribosomal protein S9      |
| UBA_LeptoII_Scaffold_8692_GENE_105 | 0.71     | 2.16           | 0.014          | Ribosomal protein S3      |
| UBA_LeptoII_Scaffold_8692_GENE_106 | 0.71     | 2.16           | 0.014          | Ribosomal protein L22     |
| UBA_LeptoII_Scaffold_8692_GENE_100 | 0.71     | 2.15           | 0.014          | Ribosomal protein L24     |
| UBA_LeptoII_Scaffold_8692_GENE_99  | 0.71     | 2.14           | 0.014          | Ribosomal protein L5      |
| UBA_LeptoII_Scaffold_8062_GENE_356 | 0.69     | 2.09           | 0.014          | Ribosomal protein S21     |
| UBA_LeptoII_Scaffold_8027_GENE_36  | 0.66     | 1.94           | 0.033          | Ribosomal protein S30EA   |
| UBA_LeptoII_Scaffold_8692_GENE_88a | 0.67     | 1.93           | 0.033          | Ribosomal protein L36     |
| UBA_LeptoII_Scaffold_8692_GENE_109 | 0.64     | 1.86           | 0.04           | Ribosomal protein L23     |
| UBA_LeptoII_Scaffold_8692_GENE_122 | 0.64     | 1.86           | 0.04           | Ribosomal protein L1      |
| UBA_LeptoII_Scaffold_8692_GENE_139 | 0.63     | 1.82           | 0.056          | Ribosomal protein S6      |
| UBA_LeptoII_Scaffold_8692_GENE_95  | 0.62     | 1.77           | 0.068          | Ribosomal protein S5      |
| UBA_LeptoII_Scaffold_8692_GENE_94  | 0.58     | 1.61           | 0.093          | Ribosomal protein L30     |
| UBA_LeptoII_Scaffold_8692_GENE_116 | 0.58     | 1.59           | 0.093          | Ribosomal protein S12     |

**Table S5c. Data for a Subset of Protein Processing Proteins whose Abundances are Strongly Correlated with Sulfate Concentrations**

| <b>Protein ID</b>                  | <b>r</b> | <b>d-score</b> | <b>Q-value</b> | <b>Annotation</b>                   |
|------------------------------------|----------|----------------|----------------|-------------------------------------|
| UBA_LeptoII_Scaffold_8241_GENE_301 | 0.76     | 4.67           | 0              | ATP-dependent protease La           |
| UBA_LeptoII_Scaffold_8692_GENE_149 | 0.66     | 3.44           | 0.015          | ClpX ATPase regulatory subunit      |
| UBA_LeptoII_Scaffold_8062_GENE_339 | 0.68     | 2.87           | 0.036          | Putative peptidase C26              |
| UBA_LeptoII_Scaffold_8241_GENE_121 | 0.54     | 2.8            | 0.036          | Peptidase S1C                       |
| UBA_LeptoII_Scaffold_8241_GENE_92  | 0.55     | 2.4            | 0.049          | Aminopeptidase N                    |
| UBA_LeptoII_Scaffold_8062_GENE_9   | 0.55     | 2.39           | 0.049          | Putative proteasome component       |
| UBA_LeptoII_Scaffold_8241_GENE_75  | 0.54     | 2.33           | 0.049          | Putative proteasome component       |
| UBA_LeptoII_Scaffold_8049_GENE_87  | 0.5      | 2.21           | 0.077          | ATP-dependent protease La           |
| UBA_LeptoII_Scaffold_8062_GENE_247 | 0.5      | 2.17           | 0.077          | Putative peptidase                  |
| UBA_LeptoII_Scaffold_8524_GENE_82  | 0.53     | 2.07           | 0.077          | Putative ATP-dependent Clp protease |
| UBA_LeptoII_Scaffold_8062_GENE_10  | 0.52     | 2.06           | 0.077          | Putative AAA-family ATPase          |

**Table S5d. Data for a Subset of Biosynthesis Proteins whose Abundances are Strongly Correlated with Calcium Concentrations**

| <b>Protein ID</b>                  | <b>r</b> | <b>d-score</b> | <b>Q-value</b> | <b>Annotation</b>                    |
|------------------------------------|----------|----------------|----------------|--------------------------------------|
| UBA_LeptoII_Scaffold_8524_GENE_127 | -0.71    | -3.04          | 0.017          | Putative bacterial surface antigen   |
| UBA_LeptoII_Scaffold_7931_GENE_236 | -0.69    | -2.09          | 0.063          | N-acetylglucosaminyltransferase      |
| UBA_LeptoII_Scaffold_8524_GENE_134 | -0.67    | -2.8           | 0.027          | Lipid A disaccharide synthase        |
| UBA_LeptoII_Scaffold_8241_GENE_6   | -0.65    | -4.54          | 0              | Cysteine desulfurase                 |
| UBA_LeptoII_Scaffold_7931_GENE_342 | -0.64    | -1.98          | 0.063          | DTDP-glucose 4_6-dehydratase         |
| UBA_LeptoII_Scaffold_8027_GENE_5   | -0.64    | -2.83          | 0.027          | Arginine decarboxylase               |
| UBA_LeptoII_Scaffold_8027_GENE_41  | -0.62    | -2.64          | 0.027          | 3-dehydroquinate synthetase          |
| UBA_LeptoII_Scaffold_8049_GENE_22  | -0.6     | -2.47          | 0.041          | Anthranilate synthase component I    |
| UBA_LeptoII_Scaffold_7931_GENE_38  | -0.59    | -2.08          | 0.063          | Holo-[acyl-carrier-protein] synthase |
| UBA_LeptoII_Scaffold_8062_GENE_340 | -0.58    | -1.84          | 0.063          | Glutamate racemase                   |
| UBA_LeptoII_Scaffold_8049_GENE_100 | -0.57    | -1.96          | 0.063          | CMP-KDO synthetase                   |
| UBA_LeptoII_Scaffold_8692_GENE_82  | -0.57    | -1.86          | 0.063          | DTDP-4-dehydrorhamnose reductase     |
| UBA_LeptoII_Scaffold_7931_GENE_84  | -0.51    | -2.18          | 0.063          | Phosphomannomutase                   |

**Table S6. Tests of Concordance Between Proteome Sample Technical Replicates. R<sup>2</sup> Values of Linear Regressions are Reported for Paired Combinations of NSAF Values from Technical Replicates (TechRep)**

| <b>Sample</b>  | <b>TechRep1 vs. TechRep2</b> | <b>TechRep1 vs. TechRep3</b> | <b>TechRep2 vs. TechRep3</b> | <b>AVERAGE</b> | <b>STDEV</b> |
|----------------|------------------------------|------------------------------|------------------------------|----------------|--------------|
| P1             | 0.938                        | 0.968                        | 0.955                        | 0.953          | 0.015        |
| P2             | 0.989                        | 0.970                        | 0.977                        | 0.979          | 0.010        |
| P4             | 0.993                        | 0.972                        | 0.963                        | 0.976          | 0.016        |
| P7             | 0.977                        | 0.951                        | 0.911                        | 0.946          | 0.033        |
| P8             | 0.969                        | 0.973                        | 0.966                        | 0.969          | 0.004        |
| P9             | 0.960                        | 0.938                        | 0.952                        | 0.950          | 0.011        |
| P10            | 0.960                        | 0.976                        | 0.978                        | 0.971          | 0.010        |
| P11            | 0.986                        | 0.933                        | 0.929                        | 0.949          | 0.032        |
| P14            | 0.958                        | 0.992                        | 0.965                        | 0.972          | 0.018        |
| P17            | 0.979                        | 0.992                        | 0.986                        | 0.986          | 0.006        |
| P20            | 0.983                        | 0.989                        | 0.990                        | 0.988          | 0.004        |
| P25            | 0.994                        | 0.993                        | 0.992                        | 0.993          | 0.001        |
| P26            | 0.968                        | 0.926                        | 0.893                        | 0.929          | 0.037        |
| P27            | 0.978                        | 0.982                        | 0.988                        | 0.982          | 0.005        |
| P28            | 0.947                        | 0.954                        | 0.980                        | 0.961          | 0.017        |
| P29            | 0.974                        | 0.962                        | 0.988                        | 0.975          | 0.013        |
| P30            | 0.967                        | 0.963                        | 0.981                        | 0.970          | 0.010        |
| P31            | 0.982                        | 0.984                        | 0.995                        | 0.987          | 0.007        |
| P33            | 0.975                        | 0.972                        | 0.972                        | 0.973          | 0.001        |
| P35            | 0.976                        | 0.984                        | 0.981                        | 0.980          | 0.004        |
| P36            | 0.987                        | 0.993                        | 0.987                        | 0.989          | 0.003        |
| P37            | 0.995                        | 0.990                        | 0.991                        | 0.992          | 0.003        |
| P38            | 0.991                        | 0.993                        | 0.984                        | 0.989          | 0.004        |
| P39            | 0.990                        | 0.987                        | 0.992                        | 0.990          | 0.003        |
| P40            | 0.989                        | 0.982                        | 0.979                        | 0.983          | 0.005        |
| P41            | 0.991                        | 0.989                        | 0.988                        | 0.989          | 0.001        |
| P43            | 0.982                        | 0.985                        | 0.990                        | 0.986          | 0.004        |
| P49            | 0.963                        | 0.970                        | 0.952                        | 0.962          | 0.009        |
| <b>AVERAGE</b> | -                            | -                            | -                            | <b>0.974</b>   | <b>0.010</b> |
